1 **Inference of differential gene regulatory networks from gene**  
2 **expression data using boosted differential trees**

3 Gihanna Galindez<sup>1,2,&</sup>, Markus List<sup>3</sup>, Jan Baumbach<sup>4,5</sup>, David B. Blumenthal<sup>6,\*</sup>, Tim  
4 Kacprowski<sup>1,2,\*</sup>

5 <sup>1</sup> Division Data Science in Biomedicine, Peter L. Reichertz Institute for Medical Informatics of  
6 Technische Universität Braunschweig and Hannover Medical School, Braunschweig, Germany

7 <sup>2</sup> Braunschweig Integrated Centre of Systems Biology (BRICS), TU Braunschweig,  
8 Braunschweig, Germany

9 <sup>3</sup> Chair of Experimental Bioinformatics, TUM School of Life Sciences, Technical University of  
10 Munich, Munich, Germany

11 <sup>4</sup> Institute for Computational Systems Biology, University of Hamburg, Hamburg, Germany

12 <sup>5</sup> Computational Biomedicine Lab, Department of Mathematics and Computer Science,  
13 University of Southern Denmark, Odense, Denmark

14 <sup>6</sup> Department Artificial Intelligence in Biomedical Engineering (AIBE), Friedrich-Alexander-  
15 Universität Erlangen-Nürnberg (FAU), Erlangen, Germany

16 <sup>&</sup> Corresponding author

17 Email: [gihanna.galindez@plri.de](mailto:gihanna.galindez@plri.de)

18 <sup>\*</sup> Joint senior authors.

19 Short title: Differential network inference with boosted differential trees

20

## Abstract

21

22

23

24

25

26

27

28

29

30

31

32

33

34

35

36

Diseases can be caused by molecular perturbations that induce specific changes in regulatory interactions and their coordinated expression, also referred to as network rewiring. However, the detection of complex changes in regulatory connections remains a challenging task and would benefit from the development of novel non-parametric approaches. We developed a new ensemble method called BoostDiff (boosted differential regression trees) to infer a differential network discriminating between two conditions. BoostDiff builds an adaptively boosted (AdaBoost) ensemble of differential trees with respect to a target condition. To build the differential trees, we propose differential variance improvement as a novel splitting criterion. Variable importance measures derived from the resulting models are used to reflect changes in gene expression predictability and to build the output differential networks. BoostDiff outperforms existing differential network methods on simulated data evaluated in two different complexity settings. We then demonstrate the power of our approach when applied to real transcriptomics data in COVID-19 and Crohn's disease. BoostDiff identifies context-specific networks that are enriched with genes of known disease-relevant pathways and complements standard differential expression analyses. BoostDiff is available at [https://github.com/gihannagalindez/boostdiff\\_inference](https://github.com/gihannagalindez/boostdiff_inference).

37

## Author Summary

38           Gene regulatory networks, which comprise the collection of regulatory relationships  
39 between transcription factors and their target genes, are important for controlling various  
40 molecular processes. Diseases can induce perturbations in normal gene co-expression patterns in  
41 these networks. Detecting differentially co-expressed or rewired edges between disease and  
42 healthy biological states can be thus useful for investigating the link between specific disease-  
43 associated molecular alterations and phenotype. We developed BoostDiff (boosted differential  
44 trees), an ensemble method to derive differential networks between two biological contexts. Our  
45 approach applies a boosting scheme using differential trees as base learner. A differential tree is  
46 a new tree structure that is built from two expression datasets using a splitting criterion called the  
47 differential variance improvement. The resulting BoostDiff model learns the most differentially  
48 predictive features which are then used to build the directed differential networks. BoostDiff  
49 outperforms other differential network methods on simulated data and outputs more biologically  
50 meaningful results when evaluated on real transcriptomics datasets. BoostDiff can be applied to  
51 gene expression data to reveal new disease mechanisms or identify potential therapeutic targets.

## 52 1. Introduction

53 Gene regulation is a fundamental biological process that underlies various cellular  
54 functions, including developmental, environmental, and disease contexts. The regulatory  
55 relationships in a biological sample can be represented by gene regulatory networks (GRNs),  
56 where two gene nodes with a regulatory relationship are connected by an edge [1]. GRN  
57 inference remains a challenging task because of the inherent complexity of transcriptional  
58 regulation, as well as the high dimensionality and noise in biological datasets. Furthermore,  
59 GRNs are dynamic and context-specific [2,3], i.e. some regulatory processes are active only in  
60 certain cell types, tissues, conditions, or in response to specific stimuli. Changes in these  
61 pairwise dependencies have been associated with the development of complex diseases [4].  
62 Differential network analysis, which aims to detect altered connectivity between different  
63 conditions or disease states, has recently emerged as a powerful complement to standard  
64 differential expression (DE) analysis and is more suitable for detecting context-specific GRNs  
65 [4,5]. Exploring how GRN structures are rewired between two different states can reveal  
66 molecular mechanisms that drive disease development and progression and identify more  
67 relevant therapeutic targets.

68 Various approaches for deriving differential networks have been the focus of recent  
69 studies [6–8]. Representative methods are shown in Table 1. The z-score method performs Fisher  
70 transformation of Pearson’s correlation coefficients between two conditions. The resulting z-  
71 scores are modeled as a normal distribution, followed by a z-test to detect significant pairwise  
72 edges [9]. Diffcoex first builds an adjacency matrix and subsequently finds differentially co-  
73 expressed gene clusters using the topological overlap measure as a dissimilarity metric [10].  
74 Another approach, the Gaussian graphical model (GGM)-based method, learns the differential  
75 network from conditional associations [11]. EBcoexpress relies on empirical Bayes’ estimation

76 to estimate the posterior probability that an edge is differentially co-expressed [12,13].

77 **Table 1.** Overview of differential network methods used for comparison (adapted from Bhuvu et  
78 al. [7]).

| Differential network method | Algorithmic approach                                        | Test             | Directionality | No. of conditions | Reference  |
|-----------------------------|-------------------------------------------------------------|------------------|----------------|-------------------|------------|
| BoostDiff                   | Tree-based                                                  | –                | Yes            | Two               | This paper |
| z-score                     | Correlation-based                                           | z-test           | No             | Two               | [9]        |
| EBcoexpress                 | Empirical Bayes + correlation                               | –                | No             | Two               | [12]       |
| Diffcoex                    | Correlation-based                                           | Permutation test | No             | Multiple          | [10]       |
| GGM-based                   | Gaussian graphical model + posterior odds                   | –                | No             | Two               | [11]       |
| chNet                       | Gaussian graphical model + differential expression analysis | t-test           | No             | Two               | [14]       |

79 The differential network methods described above measure linear relationships or rely on  
80 joint normality assumptions, which may not hold in practice [15]. In real biological datasets,  
81 complex, higher-order dependencies may be difficult to detect using correlation- or GGM-based  
82 methods. As discussed in a recent review, new methods for differential network analysis for non-  
83 Gaussian data are needed [15]. In this respect, tree-based strategies offer the advantage of more  
84 relaxed model assumptions. While examples such as GENIE3 and derived tools continue to be  
85 successfully applied in various biological settings [16,17], they cannot be used to compare  
86 different biological conditions.

87 We introduce BoostDiff, a non-parametric approach for reconstructing directed  
88 differential networks (Fig 1). We modified standard regression trees to identify gene pairs that  
89 show changes in regulatory dependencies between two biological conditions. To build the  
90 differential trees, we use a novel splitting criterion called the differential variance improvement  
91 (*DVI*), which measures the difference in predictive value of a feature on gene expression levels  
92 between two conditions. We demonstrate that boosting the differential trees with respect to  
93 samples belonging to a target condition is an important step for promoting condition specificity  
94 of the output networks. Tree-based variable importance measures can then be used to obtain a  
95 ranking of regulators.

## 96 2. Methods

### 97 2.1 Overview of the differential network inference approach

98 The differential network inference problem can be decomposed into  $p$  independent  
99 regression subproblems, where  $p$  is the total number of genes in the expression data. Our  
100 strategy assumes that, in a given biological context, the expression level of a gene can be  
101 modeled as a function of the expression levels of other genes (Fig 1). This overall principle has  
102 been described in GENIE3 [16].

103 The crucial difference between BoostDiff and GENIE3 is that we simultaneously take  
104 into account two datasets for inferring a differential network. More precisely, our approach  
105 requires the availability of (1) gene expression data matrix  $X^D = (X_{i,g}^D)_{(i,g)=(1,1)}^{(N_D,p)}$  for  $N_D$   
106 measurements from a disease condition and (2) the matrix  $X^C = (X_{i,g}^C)_{(i,g)=(1,1)}^{(N_C,p)}$  for  $N_C$   
107 measurements from a control condition, both having  $p$  total genes (columns). The inference task  
108 can be viewed as a feature selection problem that aims to find features that are more predictive of

109 expression levels in a target condition than in the baseline condition. In other words, differential  
 110 network analysis is performed by solving the regression problem while taking into account  
 111 information from two distinct labels. To achieve this, we employed the AdaBoost algorithm  
 112 using differential trees as base learners to drive the improved prediction of expression levels in  
 113 the target condition. The trained model provides a ranking of the edges by deriving a feature  
 114 importance weight for each regulator.

115 A higher feature importance value means that the gene is more predictive and thus  
 116 provides evidence of a stronger regulatory effect in one condition relative to the other. For each  
 117 gene  $g = 1, \dots, p$ , we define regression problems  $LS^{g,D} = (X_{-g}^D, X_{\bullet,g}^D)$  and  
 118  $LS^{g,C} = (X_{-g}^C, X_{\bullet,g}^C)$ . The design matrices  $X_{-g}^D$  and  $X_{-g}^C$  are obtained by deleting the  $g^{th}$   
 119 columns from  $X^D$  and  $X^C$ , respectively, and the target variables are set to the deleted columns.  
 120 The inference is performed as follows:

- 121 1. For  $g = 1, \dots, p$ :
  - 122 a. Generate the learning samples of input-output pairs  $LS^{g,D}$  and  $LS^{g,C}$  for gene  $g$ .
  - 123 b. Use a feature selection technique on  $LS^{g,D}$  and  $LS^{g,C}$  to calculate weights for all  
 124 predictor genes except for  $g$  itself. Here, an AdaBoost ensemble of differential  
 125 trees is used as the feature selection technique.
- 126 2. Aggregate and sort the  $p$  individual gene rankings to obtain a global ranking of all  
 127 differential regulatory edges.

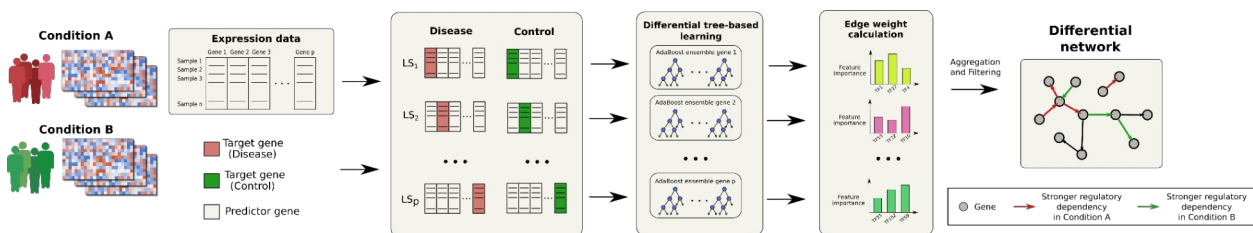

128 **Fig. 1.** Overview of the BoostDiff algorithm. As input, we require two gene expression matrices  
129 corresponding to a target condition (e.g. disease) and a baseline condition (e.g. control). For  
130 each of  $p$  total genes, a learning subsample (LS) is drawn from the two datasets, after which an  
131 AdaBoost ensemble of differential trees is built to identify the features that are more predictive  
132 of the gene expression levels in the target condition. By setting a target condition, BoostDiff can  
133 be used to identify regulatory relationships that are more pronounced in condition A (e.g.  
134 disease state) and condition B (e.g. control/healthy), thereby providing a differential network  
135 capturing context-specific regulatory changes. In the overall workflow, the BoostDiff algorithm  
136 is run twice, one with condition A as target condition and subsequently with B as target  
137 condition. The results are then combined to obtain the final differential network. Most notably,  
138 while existing approaches aim for the reconstruction of whole genome-scale GRNs, BoostDiff  
139 concentrates on maximizing the precision for those parts of the regulatory network that actually  
140 predict the difference between the two phenotypes.

## 141 *2.2 Growing a differential tree*

142 In the following, we describe the steps to build a single differential tree, assuming we  
143 start with the learning samples  $LS^{g,D}$  and  $LS^{g,C}$  as input. A differential tree is built through  
144 binary recursive partitioning. The key difference to standard regression trees is that, to determine  
145 the features (i.e., genes) used for splitting the samples at the inner nodes of our trees, we use a  
146 novel split criterion called differential variance improvement (*DVI*) instead of variance  
147 reduction.

148 At each node of the differential tree, we maintain subsets  $S^D \subseteq 1, \dots, N_D$  and  
149  $S^C \subseteq 1, \dots, N_C$  of the rows of  $LS^{g,D}$  and  $LS^{g,C}$  corresponding to the disease and control  
150 samples, respectively. Given a possible split feature (i.e., candidate predictor gene)  $g'$ , we define



151  $DVI(g')$  as follows:

$$DVI(g') = \max_{\tau} \text{VarRed}(g', \tau, S^D, LS^{g,D}) - \max_{\tau} \text{VarRed}(g', \tau, S^C, LS^{g,C})$$

152 For fixed  $g'$  and splitting threshold  $\tau$ , the variance reduction for the disease samples is given by:

$$\text{VarRed}(g', \tau, S^D, LS^{g,D}) = \text{MSE}(x_{S^D, g}^D) - \frac{|S_L^D(g', \tau)|}{|S^D|} \text{MSE}(x_{S_L^D(g', \tau), g}^D) - \frac{|S_R^D(g', \tau)|}{|S^D|} \text{MSE}(x_{S_R^D(g', \tau), g}^D)$$

153  $\text{MSE}$  is the mean squared error from the sample mean used as the impurity measure,  $x_{S, g}^D$  is the

154 restriction of the target variable to the disease samples (rows) contained in a set of samples  $S$ ,

155 and  $S_L^D(g', \tau) = \{i \in S^D : x_{i, g'}^D \leq \tau\}$  and  $S_R^D(g', \tau) = \{i \in S^D : x_{i, g'}^D > \tau\}$  are the subsets of

156 disease samples that fall to the left and right children of the candidate node, respectively.

157 Variance reduction for the control samples is defined analogously. A positive value of the  $DVI$

158 hence means that the gene  $g'$  is more predictive of  $g$ 's expression level in the disease condition

159 than in the control condition, whereas a negative  $DVI$  value indicates that the opposite is the

160 case.

161 Given training sets  $LS^{g,D}$  and  $LS^{g,C}$  for the disease and control conditions, respectively,

162 we construct a differential regression tree whose nodes are 5-tuples  $v = (S^D, D^C, g^*, \tau_D^*, \tau_C^*)$ ,

163 where  $g^*$  is the split gene,  $\tau_D^*$  is the split threshold for the disease samples, and  $\tau_C^*$  is the split

164 threshold for the control samples. Note that we use two different thresholds, since using a single

165 threshold for both conditions while optimizing the  $DVI$  will lead to a skewed expression

166 distribution in each side of the split, with one side favoring disease samples and the other side

167 favoring control samples. The construction is done as follows:

168 1. Initialize root as  $r = (S^D = 1, \dots, N_D, S^C = 1, \dots, N_C, \bullet, \bullet, \bullet)$ , where “ $\bullet$ ” is a

169 placeholder for not yet defined split genes and thresholds.

170 2. Starting at the root, recursively construct a differential tree via binary partitioning as

171 follows:

- 172       3. At the current node  $v = (S^D, S^C, \bullet, \bullet, \bullet)$  of the tree under construction, do the following:
- 173           a. If a suitable termination criterion (maximum depth or minimum number of target
- 174               or baseline samples) has been reached or  $\max_{g'} DVI(g') \leq 0$ , label  $v$  as leaf and
- 175               traceback.
- 176           b. Otherwise, set the node  $v$ 's split gene to  $g^* = \operatorname{argmax}_{g'} DVI(g')$ , its disease
- 177               threshold to  $\tau_D^* = \operatorname{argmax}_{\tau} \operatorname{VarRed}(g^*, \tau, S^D, LS^{g,D})$ , and its control threshold
- 178               to  $\tau_C^* = \operatorname{argmax}_{\tau} \operatorname{VarRed}(g^*, \tau, S^C, LS^{g,C})$ .
- 179           c. Initialize  $v$ 's left child as  $v_L = (S_L^D(g^*, \tau_D^*), S_L^C(g^*, \tau_C^*), \bullet, \bullet, \bullet)$  and its right
- 180               child as  $v_R = (S_R^D(g^*, \tau_D^*), S_R^C(g^*, \tau_C^*), \bullet, \bullet, \bullet)$  and continue with processing  $v_L$
- 181               and  $v_R$ .

182           Ultimately, the differential tree learns a hypothesis  $h(x) \rightarrow y$ , where  $y \in \mathbb{R}$ . In the

183 regression trees described by Breiman [18], the prediction for a sample is determined by

184 traversing the tree until a leaf node is reached. Here, we are more interested in predicting the

185 expression values of the samples in the target condition; thus, prediction is performed only for

186 target samples using the identified splitting thresholds  $\tau_D^*$ . The final prediction is calculated as

187 the expected value of the expression levels of the target samples assigned to the leaf nodes after

188 fitting the differential tree.

### 189 *2.3 Boosted differential trees*

190           Inspired by GRNBoost2 [17], we implemented a boosting algorithm that derives a strong

191 prediction model by sequentially training a pool of differential trees as weak learners. AdaBoost

192 for regression is typically used for solving problems where the output is a continuous variable

193 (i.e. expression levels) without explicitly considering the class of the samples. Here, we adapted

194 the AdaBoost.R2 algorithm [19] to handle the regression problem given labels from two classes

195 (i.e. conditions). Using the differential trees as base learners, the modified algorithm performs  
196 the boosting with respect to samples belonging to the specified target condition. The algorithm is  
197 described in detail in S1 Text. In this way, BoostDiff attempts to find a model that is more  
198 predictive of the target condition compared to the baseline condition. In each tree, only the target  
199 samples are re-weighted in subsequent boosting iterations, while samples from the baseline  
200 condition retain uniform weight. In particular, target samples that are more difficult to predict are  
201 selected with higher weights during the bootstrapping step and will always be compared to a  
202 uniform sample from the baseline condition. To avoid overfitting, we set a low number of trees  
203 and in practice find that 50 to 100 differential trees in the ensemble is sufficient for real datasets.

#### 204 *2.4 Variable importance measure*

205 Tree-based methods allow for the calculation of a variable importance measure that can  
206 be used to rank the features according to their relevance for predicting the output. In GENIE3,  
207 the importance of a predictor gene  $g'$  is calculated as the sum of the variance reduction across all  
208 nodes where  $g'$  is used as the splitting feature, averaged over all trees in the ensemble. In the  
209 context of differential trees, we can derive a similar measure by considering the samples  
210 belonging to the target condition (i.e. disease samples). The importance attributed to a predictor  
211 gene  $g'$  can be calculated as the weighted variance reduction across  $M$  trees in the ensemble:

$$VIM(g') = \sum_{m=1}^M \alpha^m \sum_{v \in V_{g',m}} VarRed(g', \tau_v^D, S_v^D, LS^{g',D})$$

212 here  $m$  is the boosting iteration,  $\alpha^m$  is the weight of the differential tree returned by AdaBoost,  
213  $V_{g',m}$  is the set of nodes in the tree where  $g'$  was used as the splitting feature,  
214  $VarRed(g', \tau_v^D, S_v^D, LS^{g',D})$  is the variance reduction given  $g'$ , the disease threshold  $\tau_v^D$ , and the  
215 set of disease samples  $S_v^D$  at node  $v = (S_v^D, \bullet, g', \tau_v^D, \bullet) \in V_{g',m}$  (see S1 Text).

216 Notably, because each node in a differential tree has two independent thresholds,  
217 interpreting the tree becomes more abstract with increasing depth. Boosting using shallow  
218 differential trees (e.g. differential tree stumps) thus favors greater interpretability of the variable  
219 importance measure.

#### 220 *2.4 Edge ranking and filtering from boosted differential trees*

221 Each modified AdaBoost model yields a separate ranking of the regulators. However,  
222 simply ordering the regulatory links according to the weights leads to a bias for highly variable  
223 predictor genes. To avoid this, we first scale the expression levels of each target gene to unit  
224 variance, similarly implemented in GENIE3 [16].

225 Boosting with respect to a target condition does not necessarily produce a model that  
226 predicts a gene's expression in the target condition better than its expression in the baseline  
227 condition. To illustrate, sample plots of the training progression are shown in S2 Fig. To restrict  
228 the results to differential edges, we recommend examining the distributions of the mean  
229 difference in prediction error. Sample distributions of these values from the simulated and real  
230 transcriptomics data are shown in S3 and S4 Figs, respectively. Based on these generated plots,  
231 users can filter for target genes with lower mean prediction error in the target condition than the  
232 baseline condition by applying a threshold. Alternatively, users can select the top edges with the  
233 lowest mean difference in prediction error or input a user-defined percentile. After filtering, the  
234 edges are re-ranked based on the variable importance measure used as the edge weight. The top  $n$   
235 edges are then output as the final context-specific network.

### 236 **3. Results and Discussion**

### 237 3.1 Compared methods

238 To verify the condition specificity of the output networks, we first compared the boosted  
239 differential trees to a baseline random forest of differential trees, as well as two popular GRN  
240 inference methods, GENIE3 and ARACNE [20]. GENIE3 infers a network by building an  
241 ensemble of regression trees (i.e. random forest) [16]. It was run using the corresponding R  
242 package. ARACNE calculates the mutual information (MI) between all pairs of genes [20].  
243 Afterwards, based on the data processing inequality (DPI) [21], it goes through all gene triplets  
244 and removes the edge with the weakest MI value. ARACNE was run using the implementation  
245 provided in the R package minet [22]. For both GENIE3 and ARACNE, only the disease  
246 expression matrix was used as input. For details, an AIME report is available at  
247 <https://aime.report/656I3Z/2> [23].

248 Next, we compared the performance of BoostDiff to other differential network methods.  
249 The benchmarking study conducted by Bhuva *et al.* indicated that the z-score method and  
250 EBcoexpress perform well in detecting differential edges compared to other methods [7]. Thus,  
251 we compared BoostDiff to z-score and EBcoexpress, as well as Diffcoex and a GGM-based  
252 method. Additionally, we run the more recently proposed chNet algorithm [14], which considers  
253 significant changes in both partial correlations of edges and differential expression. To facilitate  
254 comparability and given that only BoostDiff provides directionality information among the  
255 methods examined here, we converted directed edges to undirected edges [7].

### 256 3.2 Evaluation using simulated data

257 Gene expression data for disease and control conditions were simulated by adapting the  
258 SimulatorGRN approach [7], which simulates differential co-expression by knocking down  
259 nodes in the reference GRN by reducing their expression levels. In the original SimulatorGRN

260 framework, a sample can have multiple genes knocked down, even though the evaluation  
261 considers each knockdown gene separately. To eliminate the confounding effect of additional  
262 knockdown genes in our experiments, we generated the expression data in the perturbed  
263 condition such that exactly one randomly selected input gene is knocked down. We evaluated the  
264 different tools based on two scenarios, namely, using networks with 150 nodes and 300 nodes,  
265 with 500 simulations per scenario. In each simulation, 100 samples were generated per condition.  
266 The final disease samples were those which have a gene knocked down, whereas the control  
267 samples are wild-type. We measured the performance of the algorithms with respect to the  
268 association network of the SimulatorGRN framework. The hyperparameter settings for  
269 generating the simulated data are shown in S1.

270 In all analyses on simulated data, all genes except for the target gene were considered as  
271 potential regulators. The z-score method, EBcoexpress, chNet, Diffcoex, and the GGM-based  
272 method were run with the default parameters. The parameters used for the random forest of  
273 differential trees and BoostDiff are provided in S2 Table. For the COVID-19 dataset, 50 trees  
274 were used, while 100 trees were used for the Crohn's disease dataset because of the low sample  
275 size available for inference. For each simulation, we filtered for the target genes belonging to the  
276 3rd percentile based on the mean difference in prediction errors (S3 and S4 Figs).

277 BoostDiff is designed to identify the predictive regulatory relationships that are more  
278 pronounced in a target condition relative to the baseline condition. Thus, to obtain a more  
279 complete differential network, the algorithm is run twice, once using the disease condition as the  
280 target condition (with control as the baseline condition) and another using the control condition  
281 as the target condition (with disease as baseline condition). In general, combining the two results  
282 performs better than the individual sub-analyses, indicating that each run can contribute  
283 meaningful edges to the output (S1 Fig). For subsequent comparisons with other inference

284 methods, the combined results are presented.

285           The different tools have different statistical methods and cutoffs for determining the  
286 differentially coexpressed edges depending on how the algorithm works. To facilitate  
287 comparability, we show the top k predicted edges output by each method (except for chNet,  
288 wherein the number of predicted differential edges depends on the tuning parameter and is  
289 variable for each simulation; thus, extracting the top k edges cannot be consistently applied  
290 across simulations). For visualization, we show results based on the top 100 predicted genes  
291 output by each method. We report the performance using precision, recall, and F1 score as the  
292 evaluation metrics. Results were similar for varying cutoffs of k=50, 100, 150 and 200 (S6 Fig).

293           As expected, compared to GENIE3 and ARACNE, both of which infer a static network,  
294 BoostDiff can better identify the differential edges (Fig 2). The boosting scheme also performs  
295 significantly better than the random forest of differential trees. Importantly, BoostDiff  
296 outperforms the other differential network methods in all three metrics in both settings with 150  
297 and 300 nodes.

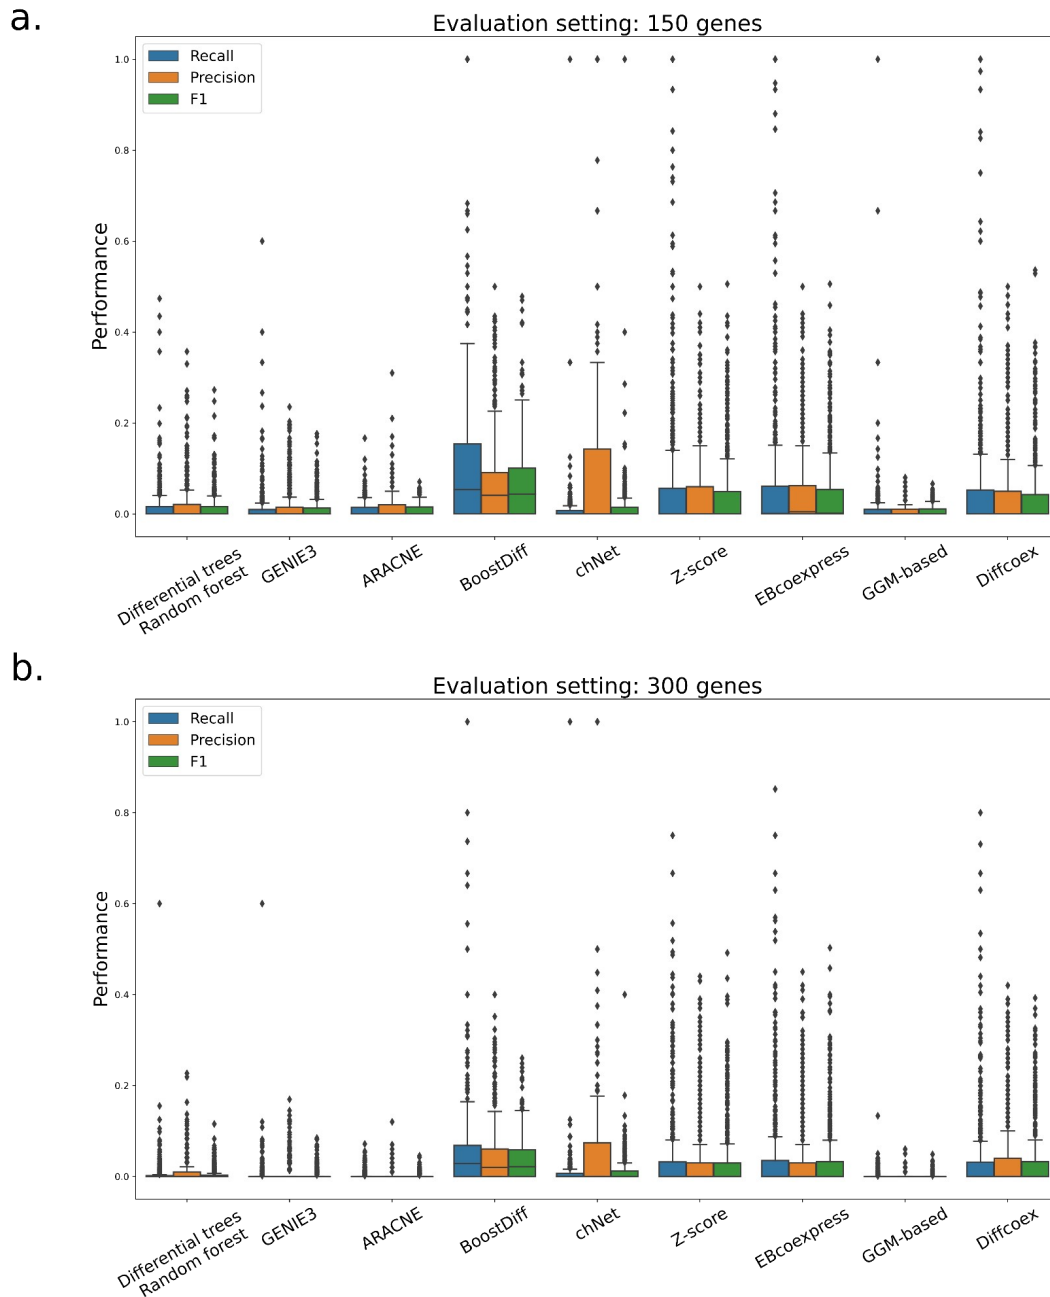

298 **Fig. 2.** Performance of differential trees and boosted differential trees compared to the standard  
299 GRN inference methods and other differential network methods using simulated data comprising  
300 a) 150 genes and b) 300 genes. A total of 500 simulations were generated per evaluation setting.  
301 BoostDiff outperforms all other methods in both scenarios and can better identify the  
302 differentially co-expressed genes.



### 303 3.3 Evaluation using real datasets

304 We evaluated BoostDiff using a publicly available COVID-19 RNA-Seq dataset. Raw  
305 gene counts were downloaded from the Gene Expression Omnibus (GEO) database under the  
306 accession number GSE156063 [24]. We used data generated from nasal swab samples from  
307 COVID-19 (n=93) and uninfected patients (n=100). Count data were normalized using the  
308 DESeq2 package in R with the variance stabilizing transformation (vst) function. We also ran  
309 BoostDiff on a Crohn's disease (CD) dataset. Normalized microarray data were downloaded  
310 from the GEO database under the accession GSE126124 [25] using data generated from colon  
311 biopsies of individuals with Crohn's disease (n=37) and healthy controls (n=19). Illumina IDs  
312 were converted to HGNC symbols using the R package biomaRt [26]. Expression levels  
313 corresponding to probes mapped to the same gene symbol were averaged. Differentially  
314 expressed genes (DEGs) were obtained using DESeq2 for the COVID-19 dataset and using  
315 limma for the Crohn's disease dataset [27,28].

316 The z-score method and EBcoexpress were run with default parameters. The parameters  
317 used for the BoostDiffs run are provided in S2 Table. For the Crohn's disease dataset, a higher  
318 number of trees (100 estimators) were used because of the lower number of samples available for  
319 inference. The list of human transcription factors downloaded from  
320 <http://humantfs.cabr.utoronto.ca/> were used as the candidate regulators [29]. For the COVID-19  
321 dataset, data were already normalized with the vst function, so we set normalize=False. All the  
322 outputs from the different methods were filtered for the top 1000 edges (except for chNet). For  
323 BoostDiff, the final network thus comprised the top 500 edges from the run where the disease  
324 condition was set as the target condition, and the top 500 edges from the run where the control  
325 condition was set as the target condition. Genes whose mean difference in prediction error of the  
326 models were more extreme than the threshold identified from the 3rd percentiles of the

327 distributions were retained. The enrichr module of the gseapy package was used to identify  
 328 enriched KEGG pathways in the output networks [30,31]. The Louvain community detection  
 329 algorithm was applied using the python-louvain package ([https://github.com/taynaud/python-](https://github.com/taynaud/python-louvain)  
 330 [louvain](https://github.com/taynaud/python-louvain)).

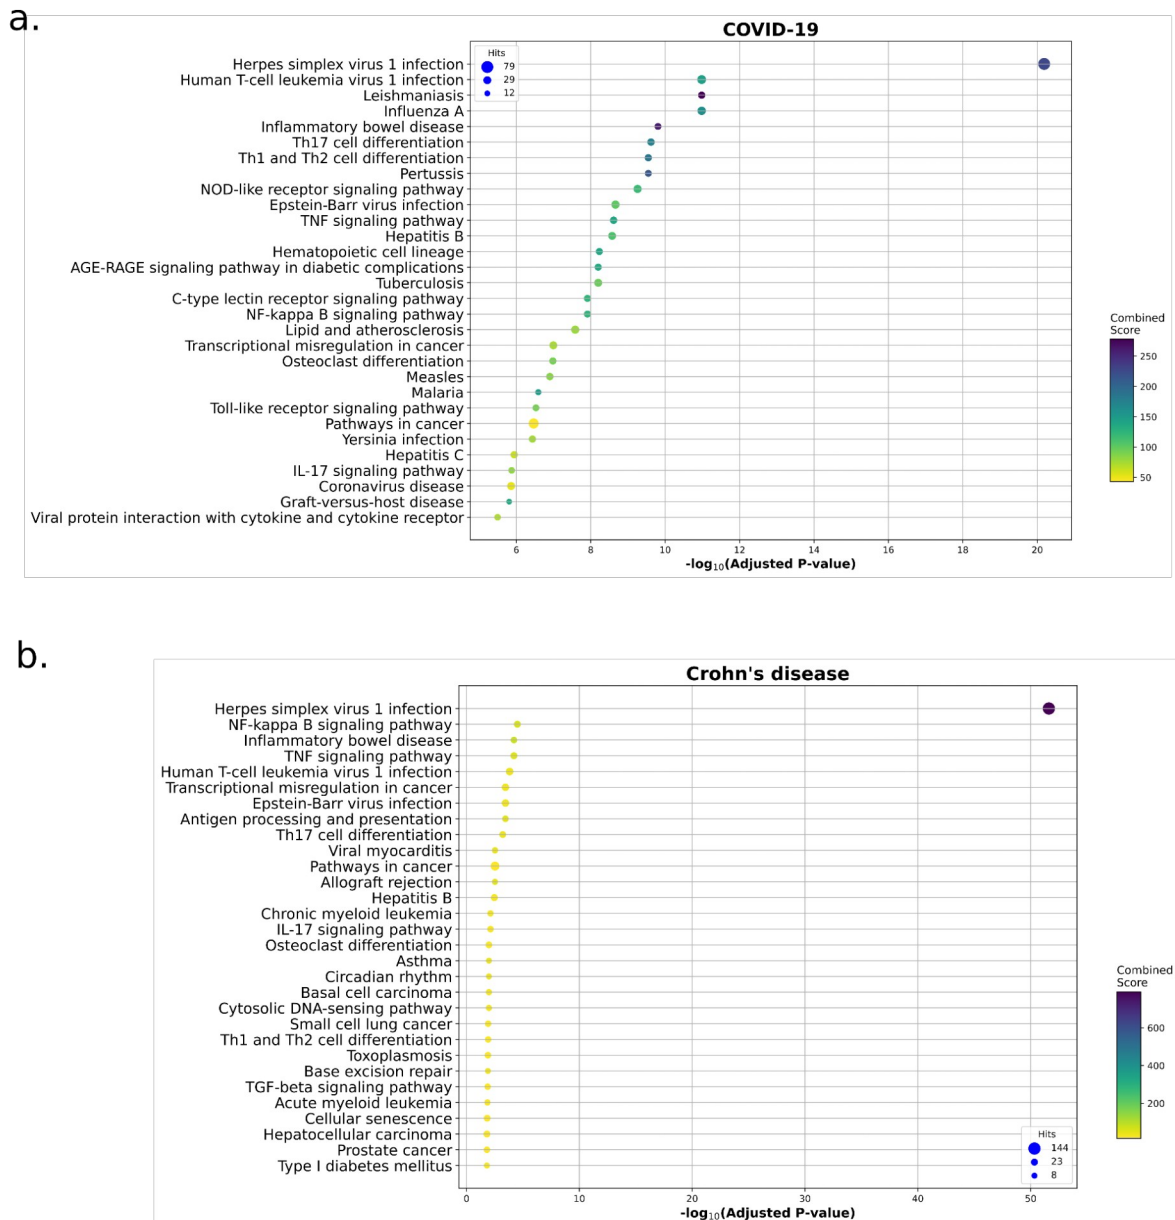

331 **Fig. 3.** Enriched KEGG pathways in the network inferred by BoostDiff for the a) COVID-19

332 dataset and b) Crohn's disease dataset.

### 333 3.3.1 COVID-19

334 The differential network output by BoostDiff is enriched with pathways that are  
335 consistent with known COVID-19 pathophysiology. In addition to various pathogenic infections,  
336 such as "Herpes simplex I infection", "Human T-cell leukemia virus," "Influenza A," "Epstein-  
337 Barr virus infection", and "Measles", the output network was significantly enriched in COVID-  
338 19-relevant pathways, such as "Coronavirus disease," "Th17 cell differentiation," "IL-17  
339 signaling pathway," "NF-kappa B signaling pathway," "NOD-like receptor pathway," "Toll-like  
340 receptor signaling pathway," and "TNF signaling pathway" (Fig 3). Toll-like receptors (TLRs)  
341 are involved in the innate immunity and function in pathogen recognition and cytokine  
342 regulation. Infection by SARS-CoV-2 particularly triggers TLR2. TNF is a key cytokine that  
343 drives inflammatory macrophage phenotype and tissue damage in severe COVID-19 [32]. The  
344 NF- $\kappa$ B pathway activation contributes to the cytokine storm that affects critically ill patients.  
345 Both NF- $\kappa$ B and TNF signaling have been proposed as therapeutic targets to prevent organ  
346 damage in COVID-19 [33]. Viral infections activate NOD-like receptors, which lead to  
347 inflammasome assembly [34]. Th17 signaling participates in the cytokine response characteristic  
348 of the "cytokine storm" and leads to the production of IL-17 [35,36]. Th17 cells were found to  
349 undergo more clonal expansion in the lungs of severe COVID-19 patients [37]. Imbalance in the  
350 Th1 and Th2 signaling has also been associated with COVID-19 mortality risk [38]. Examining  
351 the differential edges when considering the two sub-analyses separately shows generally similar  
352 results, indicating enrichment of infection related pathways (S10 Fig). The differential network  
353 output by the z-score method did not show the enrichment of COVID-19-specific pathways (S8  
354 Fig), whereas all edges in the EBcoexpress output showed zero posterior probabilities.

355 We also compared the BoostDiff network to the list of DEGs. While the overlap between  
356 the differential network and DEGs is significant, it is quite low (Jaccard similarity=0.125).  
357 Further, removing the DEGs from the genes in the differential network retained the enrichment  
358 of COVID-19-related pathways (S11 Fig), indicating that these dysregulated genes identified by  
359 BoostDiff are missed by standard DE analysis. Performing enrichment analysis separately for the  
360 targets and regulators of the predicted edges showed similar results, demonstrating the  
361 effectiveness of the feature selection approach (S12 Fig).

362 To further examine the differential network output by BoostDiff, we applied the Louvain  
363 community detection algorithm [39], which produced a total of 84 modules. We identified a  
364 dysregulated cluster comprising 59 genes that showed enrichment in the terms “Chemokine  
365 signaling pathway,” “Viral protein interaction with cytokine and cytokine receptor”,  
366 “Coronavirus disease,” “Toll-like receptor pathway,” and “Th1 and Th2 cell differentiation” (Fig  
367 4). Notable coronavirus disease-related genes in this module include *CXCL10*, *DDX58*, *STAT1*,  
368 *STAT2*, *EIF2AK2*, and *ISG15*. Other additionally known genes involved in pathogen response  
369 include *IFIT1*, *IFIT2*, *IFIT3*, *CXCL11*, *CXCL9* and *CCR1*. Chemokines are produced in response  
370 to a range of viral infections. In COVID-19, chemokine signaling has been linked to acute  
371 respiratory distress syndrome [40]. *DDX58* (RIG-1) is involved in the production of interferons  
372 in response to COVID-19 [41]. Interferon signaling mediated by *STAT1* and *STAT2* is a key  
373 antiviral defense mechanism. The chemokines *CXCL9*, *CXCL10* and *CXCL11* are known to be  
374 upregulated in the COVID-19 response [42]. *EIF2AK2* is an interferon-induced protein kinase  
375 that plays a role in inhibiting viral replication [43]. *IFIT1*, *IFIT2*, and *IFIT3* form a functional  
376 complex and participate in interferon-induced broad viral response[44,45]. *ISG15* is a ubiquitin-  
377 like protein whose activation triggers the release of various pro-inflammatory cytokines and  
378 chemokines [46]. Polymorphisms in *HLA-DRB1* have been reported in severe COVID-19

379 patients [47]. The expression of the antigen presentation gene *HLA-DQA2* has been reported to  
380 be downregulated in severe cases [48]. Based on these results, further experimental validation in  
381 this module would be of interest to uncover a more detailed mechanistic understanding of  
382 COVID-19 disease pathogenesis.

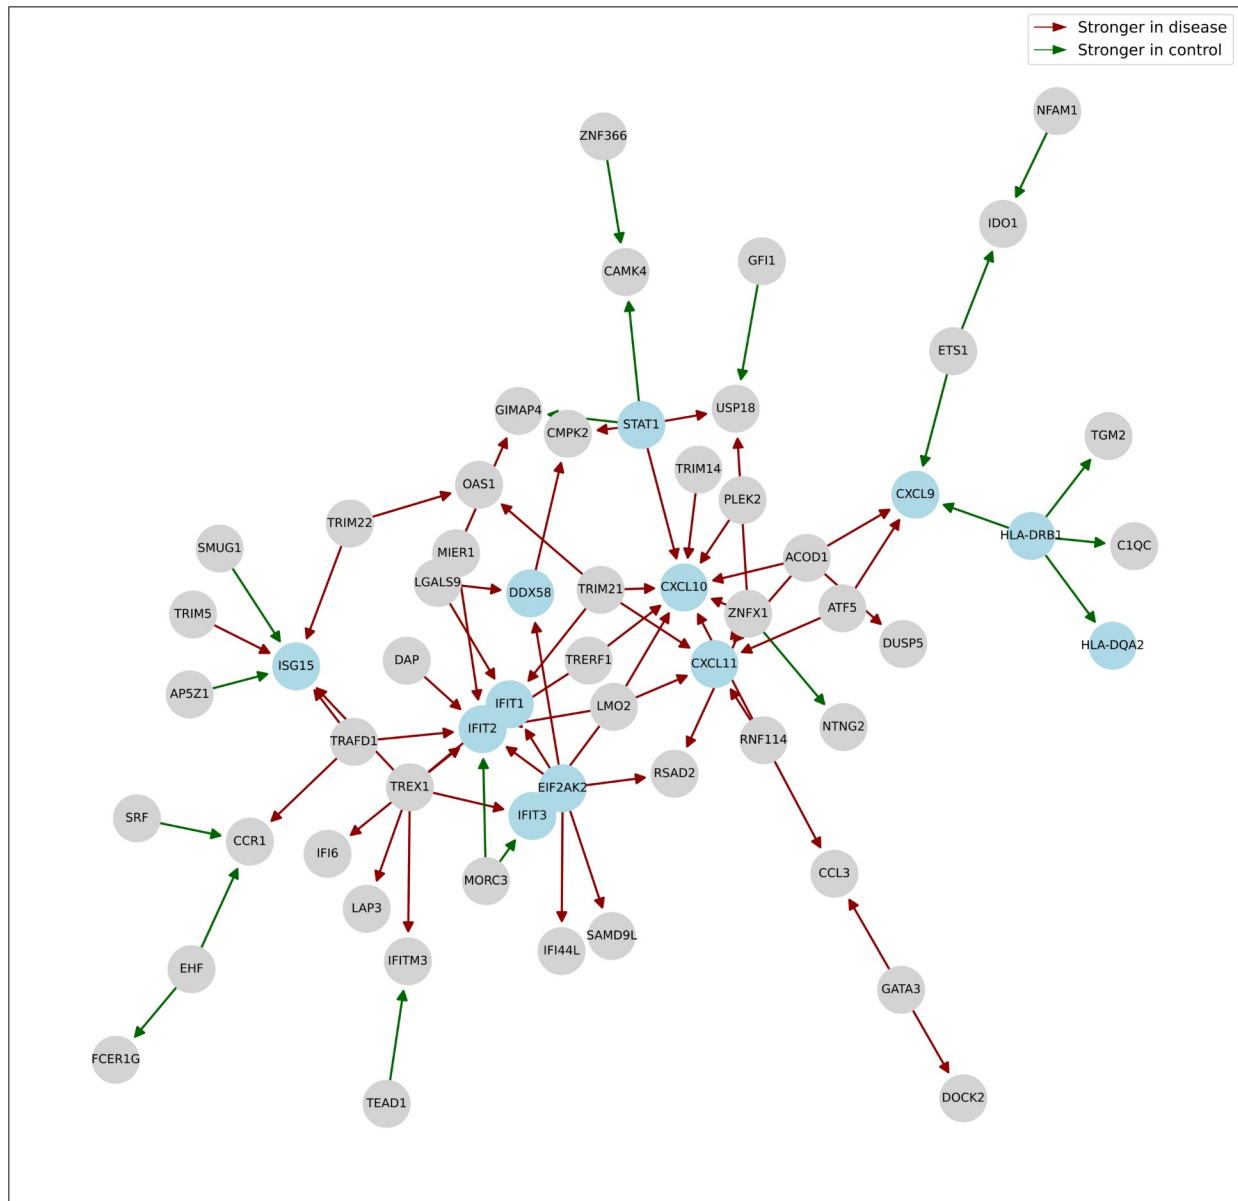

383 **Fig. 4.** Dysregulated module identified from the COVID-19 differential network inferred by  
384 BoostDiff using the Louvain algorithm. Notable genes in the module include *CLCL9*, *CXCL10*,

385 *CXCL11, DDX58, STAT1, IFIT1, IFIT2, IFIT3, EIF2AK2, HLA-DRB1, and HLA-DQA2*, which  
386 are highlighted in blue.

### 387 3.3.2 *Crohn's disease*

388 Crohn's disease (CD) and ulcerative colitis (UC) are the two main types of inflammatory  
389 bowel diseases (IBDs). CD is an autoimmune disease characterized by chronic inflammation of  
390 the gastrointestinal tract and impaired intestinal barrier function. IBDs are thought to be caused  
391 by a complex interplay between the gut microbiome, the host immune system, and the  
392 environment. Using a Crohn's disease dataset derived from CD patients and healthy controls, we  
393 derived differential networks using the z-score-based method and EBCoexpress. Although  
394 sample sizes were relatively low for this dataset, the CD-specific differential network output by  
395 BoostDiff was enriched in CD-relevant pathways, including "Inflammatory bowel disease,"  
396 "Th17 cell differentiation," "IL-17 signaling pathway", "NF- $\kappa$ B signaling," "Antigen processing  
397 and presentation", "TGF- $\beta$  pathway," and "TNF signaling pathway" (Fig 4 and S2 Table). Toll-  
398 like receptors (TLRs) play a role in host defense and homeostasis by acting as sensors of  
399 microbial pathogens. IBD has been associated with abnormal gut microbiota composition and  
400 TLR overstimulation, which in turn promotes NF- $\kappa$ B signaling and downstream inflammatory  
401 responses [49]. TGF- $\beta$  signaling plays an immunosuppressive role in mucosal inflammation, and  
402 impaired signaling can lead to intestinal fibrosis [50,51]. NF- $\kappa$ B is a transcription factor that  
403 functions in maintaining intestinal homeostasis, and dysregulation of the NF- $\kappa$ B pathway leads  
404 to sustained inflammatory state characteristic of IBD patients [52]. NF- $\kappa$ B signaling activation  
405 has been associated with more severe clinical manifestations in CD patients [52,53]. The Th17  
406 subset of CD4<sup>+</sup> T cells have well recognized roles in IBD pathogenesis. In CD, IL-17 signaling  
407 mediates the activation of Th17 cells, which further drive pro-inflammatory cascades via the

408 production of IL-21, IL-22, IFN- $\gamma$  and TNF [54]. The differential edges obtained from the sub-  
409 analysis where the control state was used as the target condition showed enrichment of further  
410 CD-relevant pathways (S13 Fig). Such cases may reveal more subtle differences in terms of  
411 differential predictivity of expression in two different disease states and motivate more refined  
412 downstream analysis by independently examining the results from the two sub-analyses.

413 Notably, the z-score method, while based on the correlation measure, did not return  
414 strong enrichment of disease-relevant pathways compared to BoostDiff. The z-score network  
415 was enriched in only one term, “Tryptophan metabolism.” While the output of EBcoexpress also  
416 identified the enrichment of several inflammatory pathways (S9 Fig), the differential network  
417 output by BoostDiff showed stronger enrichment based on the p-values. EBcoexpress on the full  
418 dataset took more than two weeks, whereas BoostDiff took less than one day (S2 and S3 Tables),  
419 thus limiting the applicability of EBcoexpress on real transcriptomics datasets. The  
420 parallelization of BoostDiff allows for more reasonable runtimes.

421 Differential expression analysis of the CD data identified ten DEGs, out of which only  
422 one was also present in the differential network identified by BoostDiff; consequently,  
423 enrichment results after removal of DEGs were similar to the original network (S14 Fig). We  
424 further performed enrichment analysis separately on the targets and regulators of the directed  
425 edges output by BoostDiff. As shown in S15 Fig, both the list of regulators and the list of targets  
426 from the differential edges were enriched in pathways related to Crohn’s disease, demonstrating  
427 the value of the *DVI*-based feature selection approach.

428 We applied the Louvain algorithm on the differential network output by BoostDiff, which  
429 identified a total of 326 modules. One interesting dysregulated module was enriched in multiple  
430 autoimmunity-related terms, including “allograft rejection,” “graft-versus-host disease,” and  
431 “autoimmune thyroid disease” (Fig 5). Notable genes in the module include *HLA-A*, *HLA-B*,

432 *HLA-G*, *HLA-H*, and *HLA-J*. The human leukocyte antigen (HLA) is a genomic region that has  
433 been genetically linked to the susceptibility to autoimmune diseases and IBD [55]. The  
434 involvement of *HLA-G* in various autoimmune diseases, including UC and CD, are well  
435 documented [56]. The associations of *HLA-A*, *HLA-B*, *HLA-G*, *HLA-H*, and *HLA-J* with CD have  
436 been previously reported in eQTL and genome-wide association studies [57]. *TRIM21* (Ro52)  
437 has also been implicated in various autoimmune conditions [58]. In IBD, *TRIM21* is involved in  
438 regulating Th1/Th17 cell differentiation and mucosal inflammation [59]. *E2F2* belongs to the E2  
439 family of transcription factors that plays a role in cell differentiation. *E2F2* expression in the  
440 colon is dysregulated in CD patients [60].



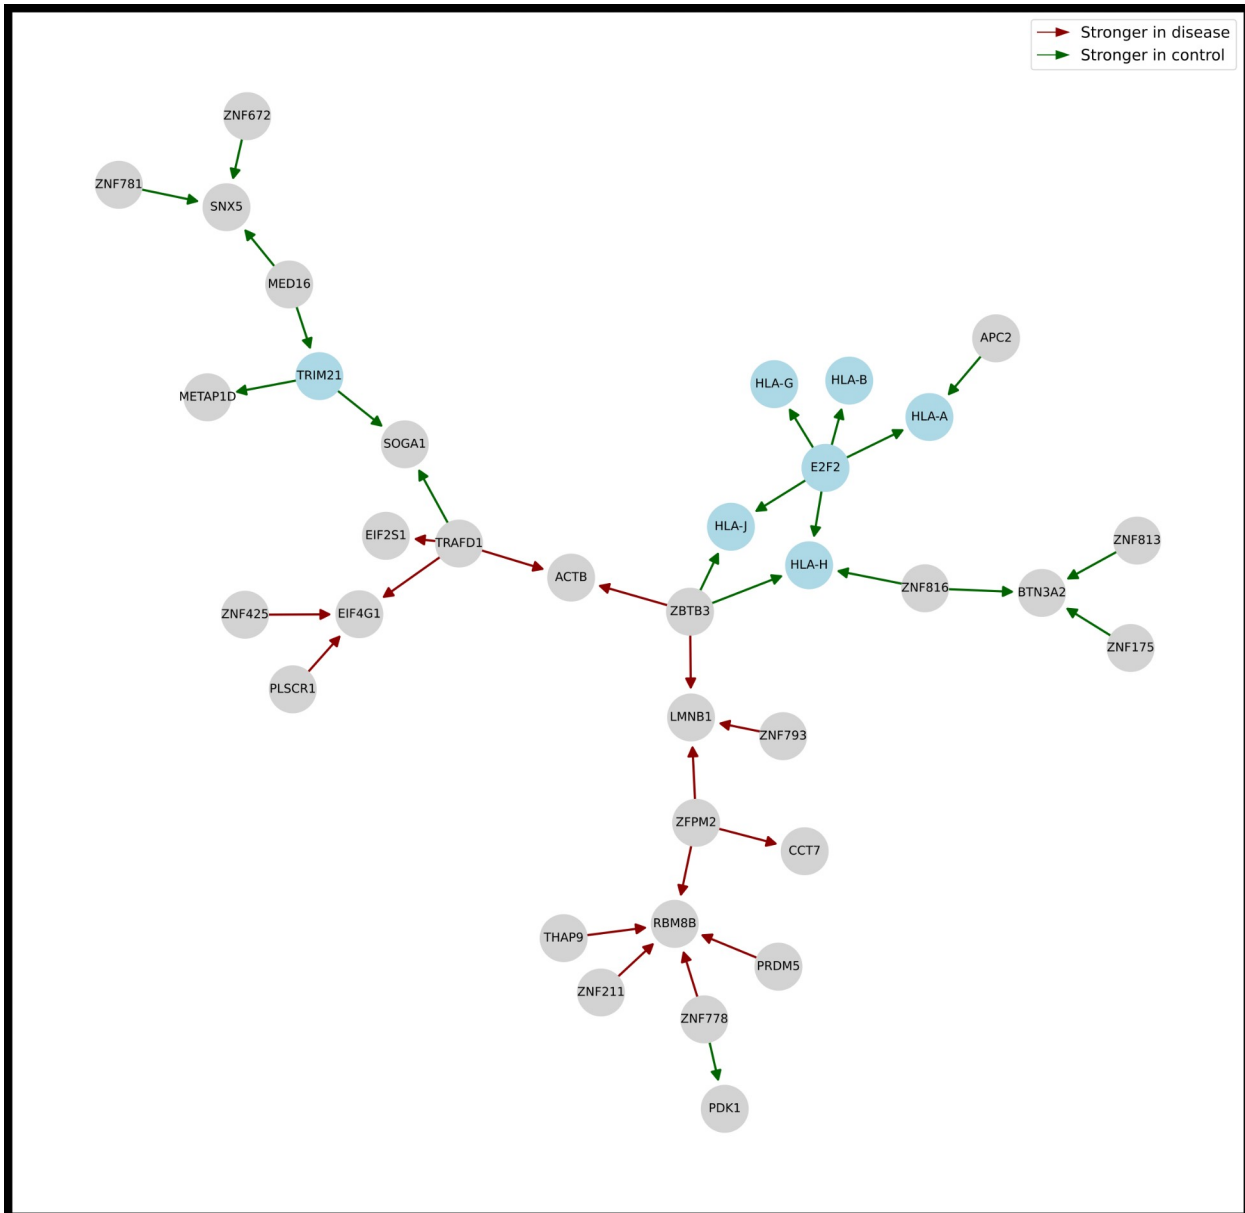

441 **Fig. 5.** Dysregulated Louvain module identified from the Crohn's disease differential network  
442 output by BoostDiff. Notable genes, namely, *HLA-A*, *HLA-B*, *HLA-G*, *HLA-H*, *HLA-J*, *TRIM21*,  
443 and *E2F2*, are highlighted in blue.

#### 444 3.3.3 Correlation distributions

445 We also examined the Pearson correlations of the top edges from the differential  
446 networks identified by BoostDiff using the original expression data. This procedure was

447 performed separately for the results of the two sub-analyses, namely, when the disease condition  
448 is used as the target condition, and when the control condition is used as the target condition. As  
449 shown in Fig 6, for the same edges, we observe a unimodal distribution of correlation values in  
450 the non-target condition and a bimodal distribution where BoostDiff identified stronger  
451 associations in the target condition, where strong positive correlation values suggest activating  
452 regulator-target relationship in the target condition, while negative values indicate inhibitory  
453 relationships. These results are consistent with the goal of identifying differential co-expression  
454 between genes. This striking observation cannot be reproduced when compared to all pairwise  
455 edges from the list of DEGs or randomly selected edges. Differential edges in either condition  
456 tend to have highly correlated expression levels, indicating dysregulation based on disease status.

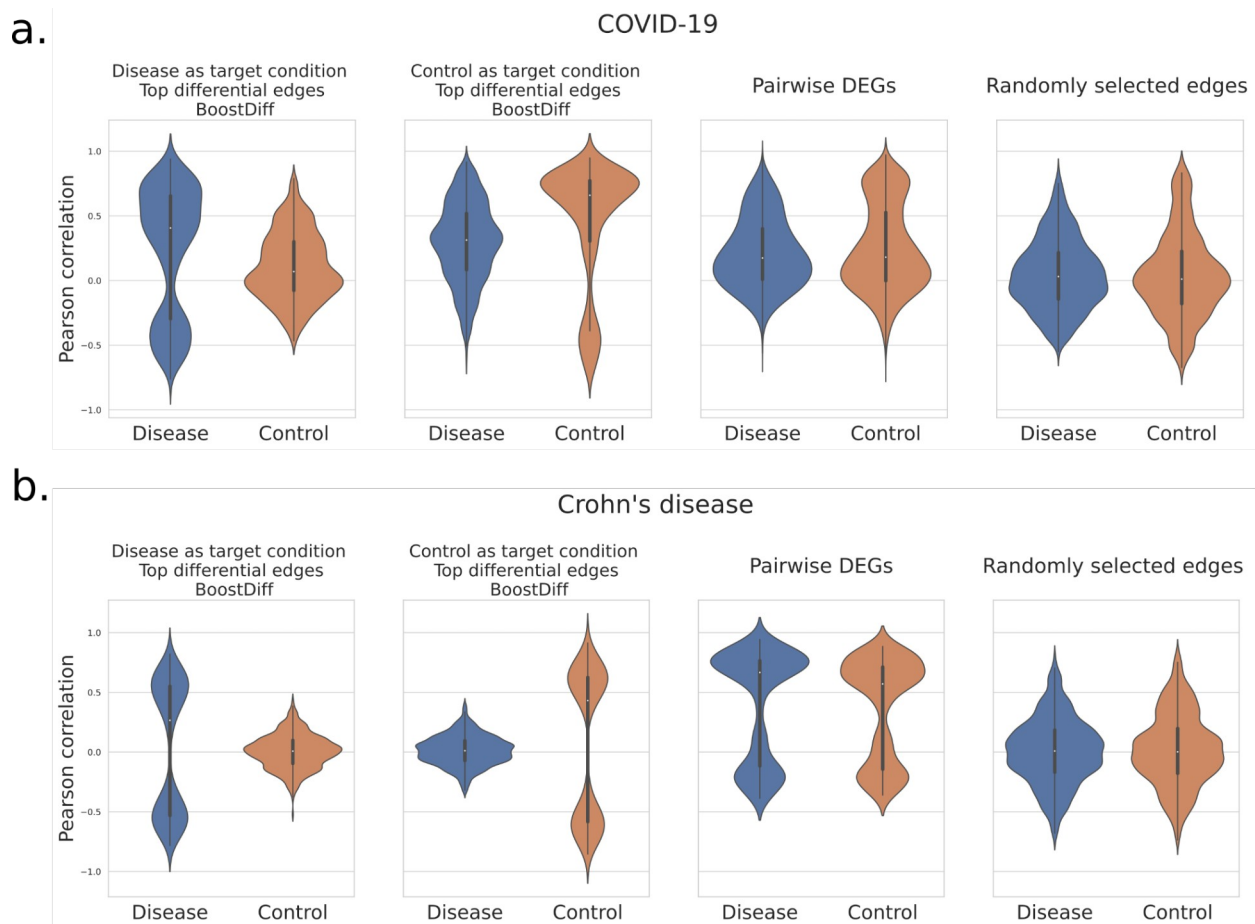

457 **Fig. 6.** Violin plots showing that the top 500 edges in the differential network predicted by  
458 BoostDiff tend to exhibit changes in correlation distributions between the disease and control  
459 expression data, indicating dysregulation in pairwise relationships. Correlations between  
460 predicted differential edges are compared to correlations between all pairwise combinations of  
461 DEGs, as well as randomly selected edges. Results are shown for a) the COVID-19 RNA-Seq  
462 dataset b) the Crohn's disease microarray dataset.

#### 463 **4. Conclusions**

464 Gene regulation is a complex process that changes under different biological contexts.  
465 Differential network biology explores the rewiring of these regulatory interaction landscapes that  
466 are fundamentally distinct from the static networks that are inferred in most standard GRN  
467 inference methods [3]. By additionally considering the regulatory dependencies from a baseline  
468 condition, we can uncover a more refined picture underlying the molecular processes that are  
469 perturbed in a condition of interest, such as disease.

470 Inference of networks from biological expression data is a challenging task. The novelty  
471 of BoostDiff is twofold: 1) We employ differential variance improvement as the splitting  
472 measure in a tree-based algorithm that can explicitly compare two datasets with a continuous  
473 output variable; 2) BoostDiff adapts the AdaBoost algorithm to use differential trees as the base  
474 learner. Boosting the differential trees with respect to samples belonging to the target condition  
475 is a crucial step that significantly improves the detection of differential edges.

476 BoostDiff outperformed existing differential network methods on simulated data and can  
477 better handle the simulated datasets with higher dimensionality. BoostDiff yields biologically  
478 meaningful results and is more practically applicable on real-world transcriptomics datasets. We  
479 showed that the differential networks inferred by BoostDiff are consistent with the known

480 pathophysiology of COVID-19 and Crohn's disease. The performance of BoostDiff can be  
481 attributed to the tree-based nature of the algorithm, which performs inference of differential  
482 networks without assuming parametric distributions of gene expression. In particular, BoostDiff  
483 has more relaxed model assumptions and can better capture complex changes in gene  
484 dependencies in biological contexts, which could be missed by tools that employ correlation-  
485 based measures. BoostDiff is also scalable since it builds one model for each gene and can hence  
486 easily be parallelized.

487         Nevertheless, our method has several limitations. First, BoostDiff can only compare two  
488 conditions at a time. Moreover, BoostDiff is similar to GENIE3 in that it does not perform  
489 statistical testing. Instead, scores are assigned to individual edges by calculating tree-based  
490 variable importance measures; thus, only the ranking of the edge weights is considered. Further,  
491 the AdaBoost algorithm can be prone to overfitting, although this can be avoided by setting a  
492 low number of base differential trees.

493         The application of BoostDiff is not limited to gene expression data; the proposed feature  
494 selection approach can be generalized to other omics datasets. For instance, BoostDiff can be  
495 applied to proteomics or metabolomics data that aim to detect changes in dependencies of  
496 proteins or metabolites. Moreover, the simple but effective strategy implemented in BoostDiff is  
497 an algorithmic advancement that can be further extended to other problems that aim to extract  
498 differentially predictive features. Adapting BoostDiff for analyzing time-series datasets is also a  
499 promising research direction.

## 500 **Acknowledgements**

501         We are grateful to Julian Beier for technical support.

502 **Author contributions**

503 Writing – Original Draft Preparation: GG. Methodology: GG, DBB, TK. Software: GG.  
504 Supervision: DBB, TK. Conceptualization: ML, JB, DBB, TK. Writing – Review & Editing: ML,  
505 JB, DBB, TK.

506 **Data Availability**

507 Transcriptomics data used for biological evaluation can be downloaded from Gene  
508 Expression Omnibus under the accession numbers GSE156063 and GSE126124. Our BoostDiff  
509 implementation is available on GitHub: [https://github.com/gihannagalindez/boostdiff\\_inference](https://github.com/gihannagalindez/boostdiff_inference).

510 **Competing Interests**

511 The authors declare no competing interests.

## 512 References

- 513 1. Karlebach G, Shamir R. Modelling and analysis of gene regulatory networks. *Nat Rev Mol*  
514 *Cell Biol.* 2008;9: 770–780.
- 515 2. Nagy-Staron A, Tomasek K, Caruso Carter C, Sonnleitner E, Kavčič B, Paixão T, et al.  
516 Local genetic context shapes the function of a gene regulatory network. *Elife.* 2021;10.  
517 doi:10.7554/eLife.65993
- 518 3. Ideker T, Krogan NJ. Differential network biology. *Mol Syst Biol.* 2012;8: 565.
- 519 4. Fuente A de la, de la Fuente A. From “differential expression” to “differential networking”  
520 – identification of dysfunctional regulatory networks in diseases. *Trends in Genetics.* 2010.  
521 pp. 326–333. doi:10.1016/j.tig.2010.05.001
- 522 5. Marbach D, Costello JC, Küffner R, Vega NM, Prill RJ, Camacho DM, et al. Wisdom of  
523 crowds for robust gene network inference. *Nat Methods.* 2012;9: 796–804.
- 524 6. Baur B, Shin J, Zhang S, Roy S. Data integration for inferring context-specific gene  
525 regulatory networks. *Curr Opin Syst Biol.* 2020;23: 38–46.
- 526 7. Bhuva DD, Cursons J, Smyth GK, Davis MJ. Differential co-expression-based detection of  
527 conditional relationships in transcriptional data: comparative analysis and application to  
528 breast cancer. *Genome Biol.* 2019;20: 236.
- 529 8. Basha O, Argov CM, Artzy R, Zoabi Y, Hekselman I, Alfandari L, et al. Differential  
530 network analysis of multiple human tissue interactomes highlights tissue-selective processes  
531 and genetic disorder genes. *Bioinformatics.* 2020;36: 2821–2828.
- 532 9. Zhang J, Ji Y, Zhang L. Extracting three-way gene interactions from microarray data.  
533 *Bioinformatics.* 2007;23: 2903–2909.
- 534 10. Tesson BM, Breitling R, Jansen RC. DiffCoEx: a simple and sensitive method to find  
535 differentially coexpressed gene modules. *BMC Bioinformatics.* 2010;11: 497.
- 536 11. Chu J-H, Lazarus R, Carey VJ, Raby BA. Quantifying differential gene connectivity  
537 between disease states for objective identification of disease-relevant genes. *BMC Syst*  
538 *Biol.* 2011;5: 89.
- 539 12. Dawson JA, Kendzierski C. An empirical Bayesian approach for identifying differential  
540 coexpression in high-throughput experiments. *Biometrics.* 2012;68: 455–465.
- 541 13. Dawson JA, Ye S, Kendzierski C. R/EBcoexpress: an empirical Bayesian framework for  
542 discovering differential co-expression. *Bioinformatics.* 2012;28: 1939–1940.
- 543 14. Tu J-J, Ou-Yang L, Zhu Y, Yan H, Qin H, Zhang X-F. Differential network analysis by  
544 simultaneously considering changes in gene interactions and gene expression.

- 545            Bioinformatics. 2021. doi:10.1093/bioinformatics/btab502
- 546    15.    Shojaie A. Differential network analysis: A statistical perspective. *Wiley Interdiscip Rev*  
547            *Comput Stat.* 2021;13: e1508.
- 548    16.    Huynh-Thu VA, Irrthum A, Wehenkel L, Geurts P. Inferring regulatory networks from  
549            expression data using tree-based methods. *PLoS One.* 2010;5.  
550            doi:10.1371/journal.pone.0012776
- 551    17.    Moerman T, Aibar Santos S, Bravo González-Blas C, Simm J, Moreau Y, Aerts J, et al.  
552            GRNBoost2 and Arboreto: efficient and scalable inference of gene regulatory networks.  
553            *Bioinformatics.* 2019;35: 2159–2161.
- 554    18.    Breiman L, Friedman JH, Olshen RA, Stone CJ. *Classification and regression trees.*  
555            Belmont, CA: Wadsworth. International Group. 1984;432: 151–166.
- 556    19.    Drucker H. Improving regressors using boosting techniques. *ICML. Citeseer;* 1997. pp.  
557            107–115.
- 558    20.    Margolin AA, Nemenman I, Basso K, Wiggins C, Stolovitzky G, Dalla Favera R, et al.  
559            ARACNE: an algorithm for the reconstruction of gene regulatory networks in a mammalian  
560            cellular context. *BMC Bioinformatics.* 2006;7 Suppl 1: S7.
- 561    21.    Cover TM. *Elements of information theory.* John Wiley & Sons; 1999.
- 562    22.    Meyer PE, Lafitte F, Bontempi G. minet: A R/Bioconductor package for inferring large  
563            transcriptional networks using mutual information. *BMC Bioinformatics.* 2008;9: 461.
- 564    23.    Matschinske J, Alcaraz N, Benis A, Golebiewski M, Grimm DG, Heumos L, et al. The  
565            AIME registry for artificial intelligence in biomedical research. *Nat Methods.* 2021;18:  
566            1128–1131.
- 567    24.    Mick E, Kamm J, Pisco AO, Ratnasiri K, Babik JM, Castañeda G, et al. Upper airway gene  
568            expression reveals suppressed immune responses to SARS-CoV-2 compared with other  
569            respiratory viruses. *Nat Commun.* 2020;11: 5854.
- 570    25.    Palmer NP, Silvester JA, Lee JJ, Beam AL, Fried I, Valtchinov VI, et al. Concordance  
571            between gene expression in peripheral whole blood and colonic tissue in children with  
572            inflammatory bowel disease. *PLoS One.* 2019;14: e0222952.
- 573    26.    Durinck S, Spellman PT, Birney E, Huber W. Mapping identifiers for the integration of  
574            genomic datasets with the R/Bioconductor package biomaRt. *Nat Protoc.* 2009;4: 1184–  
575            1191.
- 576    27.    Ritchie ME, Phipson B, Wu D, Hu Y, Law CW, Shi W, et al. limma powers differential  
577            expression analyses for RNA-sequencing and microarray studies. *Nucleic Acids Res.*  
578            2015;43: e47.
- 579    28.    Love MI, Huber W, Anders S. Moderated estimation of fold change and dispersion for

- 580 RNA-seq data with DESeq2. *Genome Biol.* 2014;15: 550.
- 581 29. Lambert SA, Jolma A, Campitelli LF, Das PK, Yin Y, Albu M, et al. The Human  
582 Transcription Factors. *Cell.* 2018;175: 598–599.
- 583 30. Kuleshov MV, Jones MR, Rouillard AD, Fernandez NF, Duan Q, Wang Z, et al. Enrichr: a  
584 comprehensive gene set enrichment analysis web server 2016 update. *Nucleic Acids Res.*  
585 2016;44: W90–7.
- 586 31. Subramanian A, Tamayo P, Mootha VK, Mukherjee S, Ebert BL, Gillette MA, et al. Gene  
587 set enrichment analysis: a knowledge-based approach for interpreting genome-wide  
588 expression profiles. *Proc Natl Acad Sci U S A.* 2005;102: 15545–15550.
- 589 32. Zhang F, Mears JR, Shakib L, Beynor JI, Shanaj S, Korsunsky I, et al. IFN- $\gamma$  and TNF- $\alpha$   
590 drive a CXCL10+ CCL2+ macrophage phenotype expanded in severe COVID-19 lungs and  
591 inflammatory diseases with tissue inflammation. *Genome Med.* 2021;13: 64.
- 592 33. Keewan E 'a, Beg S, Naser SA. Anti-TNF- $\alpha$  agents Modulate SARS-CoV-2 Receptors and  
593 Increase the Risk of Infection Through Notch-1 Signaling. *Front Immunol.* 2021;12:  
594 641295.
- 595 34. Yap JKY, Moriyama M, Iwasaki A. Inflammasomes and Pyroptosis as Therapeutic Targets  
596 for COVID-19. *J Immunol.* 2020;205: 307–312.
- 597 35. Martonik D, Parfieniuk-Kowerda A, Rogalska M, Flisiak R. The Role of Th17 Response in  
598 COVID-19. *Cells.* 2021;10. doi:10.3390/cells10061550
- 599 36. Wu D, Yang XO. TH17 responses in cytokine storm of COVID-19: An emerging target of  
600 JAK2 inhibitor Fedratinib. *J Microbiol Immunol Infect.* 2020;53: 368–370.
- 601 37. Zhao Y, Kilian C, Turner J-E, Bosurgi L, Roedl K, Bartsch P, et al. Clonal expansion and  
602 activation of tissue-resident memory-like T<sub>H</sub> 17 cells expressing GM-CSF in the lungs of  
603 patients with severe COVID-19. *Science Immunology.* 2021.  
604 doi:10.1126/sciimmunol.abf6692
- 605 38. Pavel AB, Glickman JW, Michels JR, Kim-Schulze S, Miller RL, Guttman-Yassky E.  
606 Th2/Th1 Cytokine Imbalance Is Associated With Higher COVID-19 Risk Mortality. *Front*  
607 *Genet.* 2021;12: 706902.
- 608 39. Blondel VD, Guillaume J-L, Lambiotte R, Lefebvre E. Fast unfolding of communities in  
609 large networks. *Journal of Statistical Mechanics: Theory and Experiment.* 2008. p. P10008.  
610 doi:10.1088/1742-5468/2008/10/p10008
- 611 40. Zhou Z, Ren L, Zhang L, Zhong J, Xiao Y, Jia Z, et al. Heightened Innate Immune  
612 Responses in the Respiratory Tract of COVID-19 Patients. *Cell Host Microbe.* 2020;27:  
613 883–890.e2.
- 614 41. Yamada T, Sato S, Sotoyama Y, Orba Y, Sawa H, Yamauchi H, et al. RIG-I triggers a  
615 signaling-abortive anti-SARS-CoV-2 defense in human lung cells. *Nat Immunol.* 2021;22:



- 616 820–828.
- 617 42. Callahan V, Hawks S, Crawford MA, Lehman CW, Morrison HA, Ivester HM, et al. The  
618 Pro-Inflammatory Chemokines CXCL9, CXCL10 and CXCL11 Are Upregulated Following  
619 SARS-CoV-2 Infection in an AKT-Dependent Manner. *Viruses*. 2021. p. 1062.  
620 doi:10.3390/v13061062
- 621 43. Zhao J, Sun L, Zhao Y, Feng D, Cheng J, Zhang G. Coronavirus Endoribonuclease Ensures  
622 Efficient Viral Replication and Prevents Protein Kinase R Activation. *J Virol*. 2020.  
623 doi:10.1128/JVI.02103-20
- 624 44. Singh DK, Aladyeva E, Das S, Singh B, Esaulova E, Swain A, et al. Myeloid cell interferon  
625 responses correlate with clearance of SARS-CoV-2. *Nat Commun*. 2022;13: 679.
- 626 45. Mears HV, Sweeney TR. Better together: the role of IFIT protein–protein interactions in the  
627 antiviral response. *Journal of General Virology*. 2018. pp. 1463–1477.  
628 doi:10.1099/jgv.0.001149
- 629 46. Cao X. ISG15 secretion exacerbates inflammation in SARS-CoV-2 infection. *Nat Immunol*.  
630 2021;22: 1360–1362.
- 631 47. Migliorini F, Torsiello E, Spiezia F, Oliva F, Tingart M, Maffulli N. Association between  
632 HLA genotypes and COVID-19 susceptibility, severity and progression: a comprehensive  
633 review of the literature. *Eur J Med Res*. 2021;26: 84.
- 634 48. Shkurnikov M, Nersisyan S, Jankevic T, Galatenko A, Gordeev I, Vechorko V, et al.  
635 Association of HLA Class I Genotypes With Severity of Coronavirus Disease-19. *Frontiers*  
636 *in Immunology*. 2021. doi:10.3389/fimmu.2021.641900
- 637 49. Hug H, Mohajeri MH, La Fata G. Toll-Like Receptors: Regulators of the Immune Response  
638 in the Human Gut. *Nutrients*. 2018;10. doi:10.3390/nu10020203
- 639 50. Ihara S, Hirata Y, Koike K. TGF- $\beta$  in inflammatory bowel disease: a key regulator of  
640 immune cells, epithelium, and the intestinal microbiota. *J Gastroenterol*. 2017;52: 777–787.
- 641 51. Stolfi C, Troncione E, Marafini I, Monteleone G. Role of TGF-Beta and Smad7 in Gut  
642 Inflammation, Fibrosis and Cancer. *Biomolecules*. 2020;11. doi:10.3390/biom11010017
- 643 52. Zaidi D, Wine E. Regulation of Nuclear Factor Kappa-Light-Chain-Enhancer of Activated  
644 B Cells (NF- $\kappa$ B) in Inflammatory Bowel Diseases. *Frontiers in Pediatrics*. 2018.  
645 doi:10.3389/fped.2018.00317
- 646 53. Han YM, Koh J, Kim JW, Lee C, Koh S-J, Kim B, et al. NF-kappa B activation correlates  
647 with disease phenotype in Crohn’s disease. *PLOS ONE*. 2017. p. e0182071.  
648 doi:10.1371/journal.pone.0182071
- 649 54. Schmitt H, Neurath MF, Atreya R. Role of the IL23/IL17 Pathway in Crohn’s Disease.  
650 *Frontiers in Immunology*. 2021. doi:10.3389/fimmu.2021.622934

- 651 55. Ashton JJ, Latham K, Beattie RM, Ennis S. Review article: the genetics of the human  
652 leucocyte antigen region in inflammatory bowel disease. *Aliment Pharmacol Ther.* 2019;50:  
653 885–900.
- 654 56. Rizzo R, Bortolotti D, Bolzani S, Fainardi E. HLA-G Molecules in Autoimmune Diseases  
655 and Infections. *Front Immunol.* 2014;5: 592.
- 656 57. Narzo AFD, Di Narzo AF, Peters LA, Argmann C, Stojmirovic A, Perrigoue J, et al. Blood  
657 and Intestine eQTLs from an Anti-TNF-Resistant Crohn’s Disease Cohort Inform IBD  
658 Genetic Association Loci. *Clinical and Translational Gastroenterology.* 2016. p. e177.  
659 doi:10.1038/ctg.2016.34
- 660 58. Oke V, Wahren-Herlenius M. The immunobiology of Ro52 (TRIM21) in autoimmunity: a  
661 critical review. *J Autoimmun.* 2012;39: 77–82.
- 662 59. Zhou G, Wu W, Yu L, Yu T, Yang W, Wang P, et al. Tripartite motif-containing (TRIM)  
663 21 negatively regulates intestinal mucosal inflammation through inhibiting TH1/TH17 cell  
664 differentiation in patients with inflammatory bowel diseases. *Journal of Allergy and Clinical*  
665 *Immunology.* 2018. pp. 1218–1228.e12. doi:10.1016/j.jaci.2017.09.038
- 666 60. Toyonaga T, Steinbach EC, Keith BP, Barrow JB, Schaner MR, Wolber EA, et al.  
667 Decreased Colonic Activin Receptor-Like Kinase 1 Disrupts Epithelial Barrier Integrity in  
668 Patients With Crohn’s Disease. *Cellular and Molecular Gastroenterology and Hepatology.*  
669 2020. pp. 779–796. doi:10.1016/j.jcmgh.2020.06.005

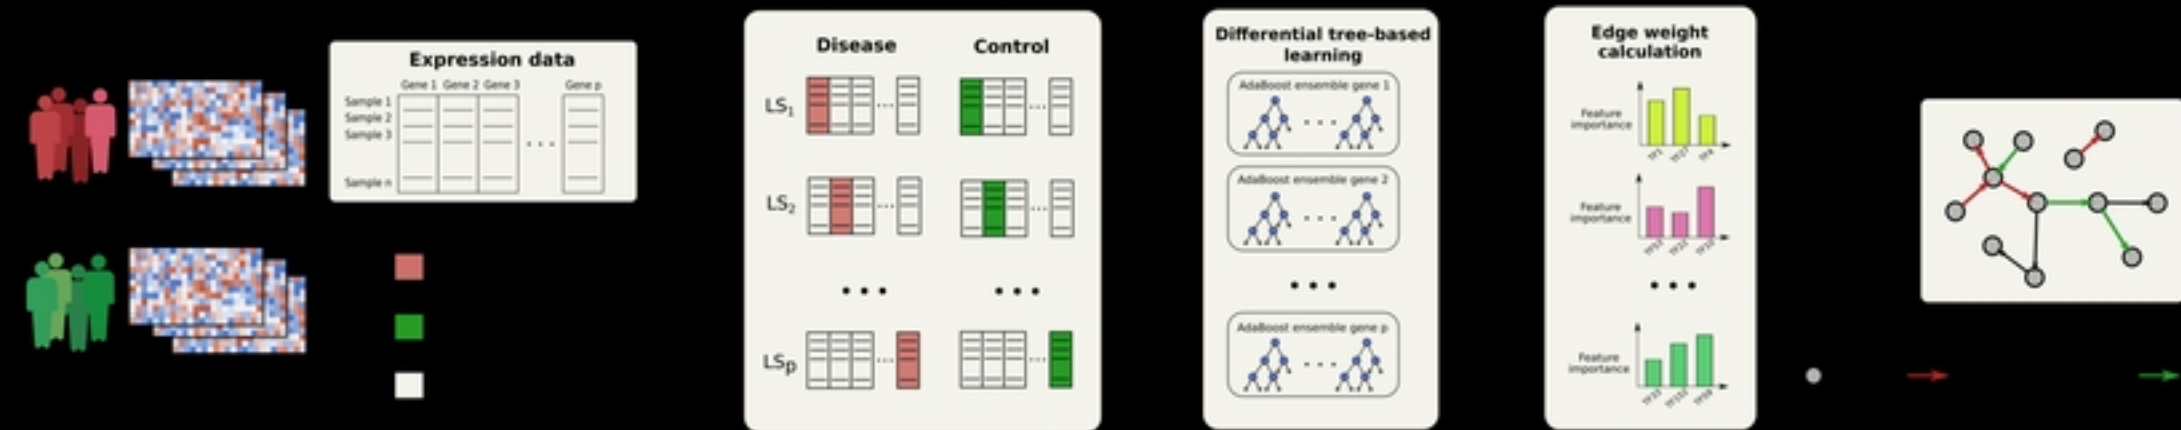

Figure 1

<https://doi.org/10.1101/2022.09.26.509450>; this version posted September 27, 2022. The copyright holder for this preprint (which was not certified by peer review) is the author/funder, who has granted bioRxiv a license to display the preprint in perpetuity. It is made available under aCC-BY 4.0 International license.

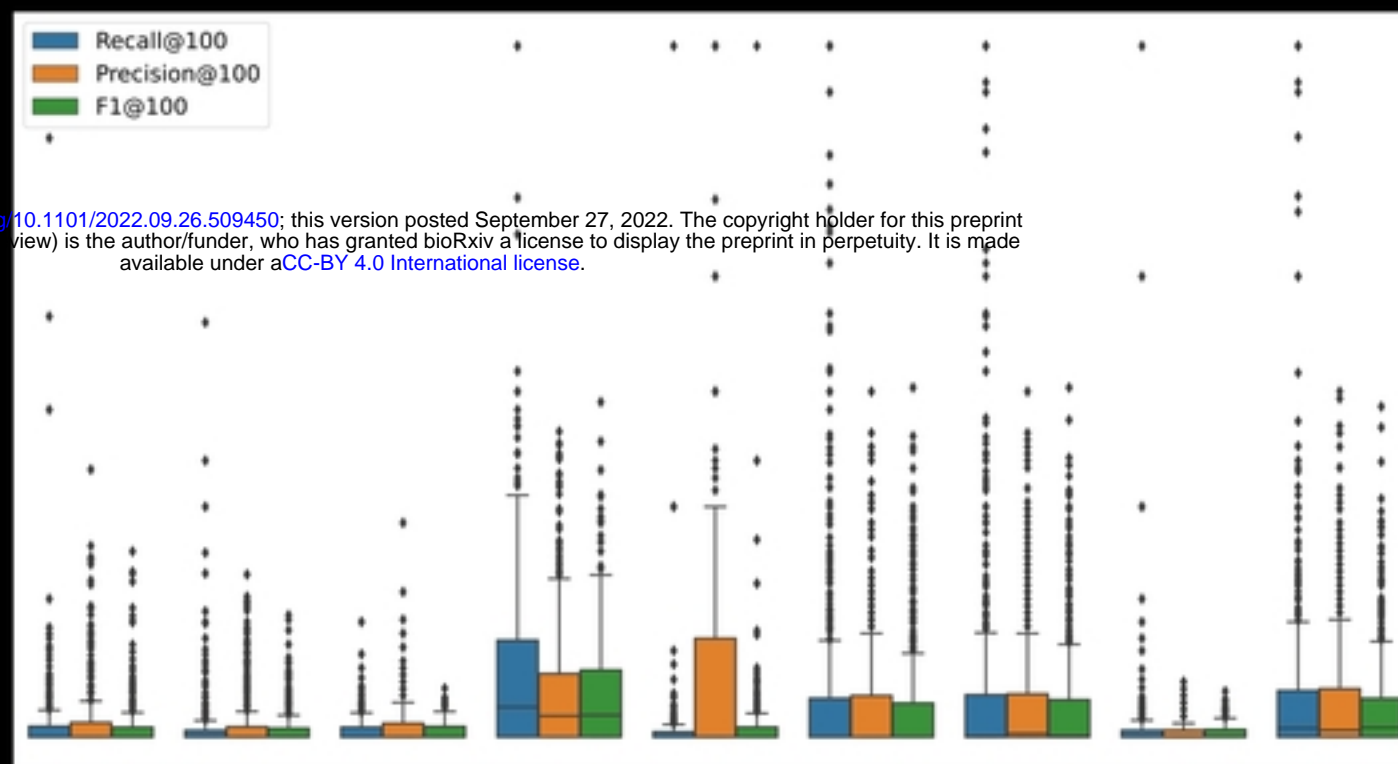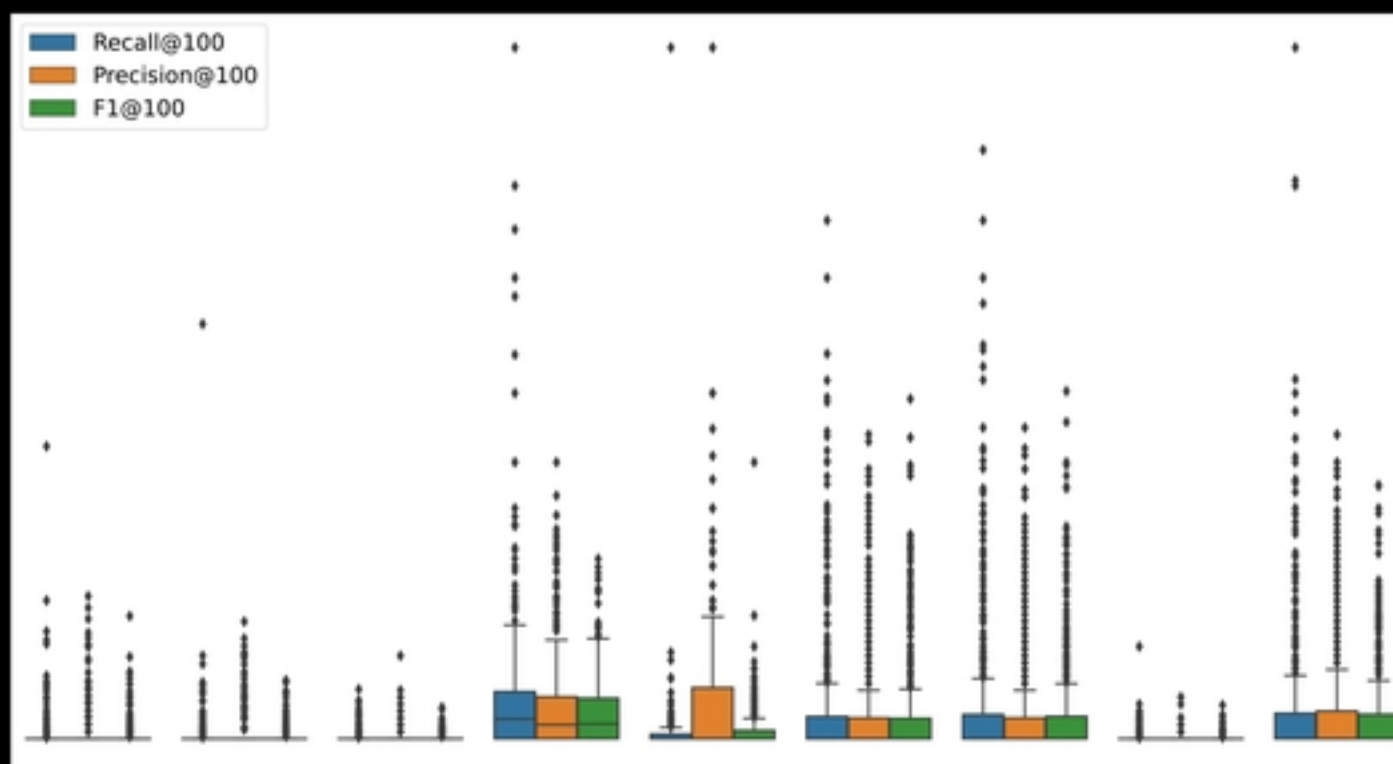

Figure2

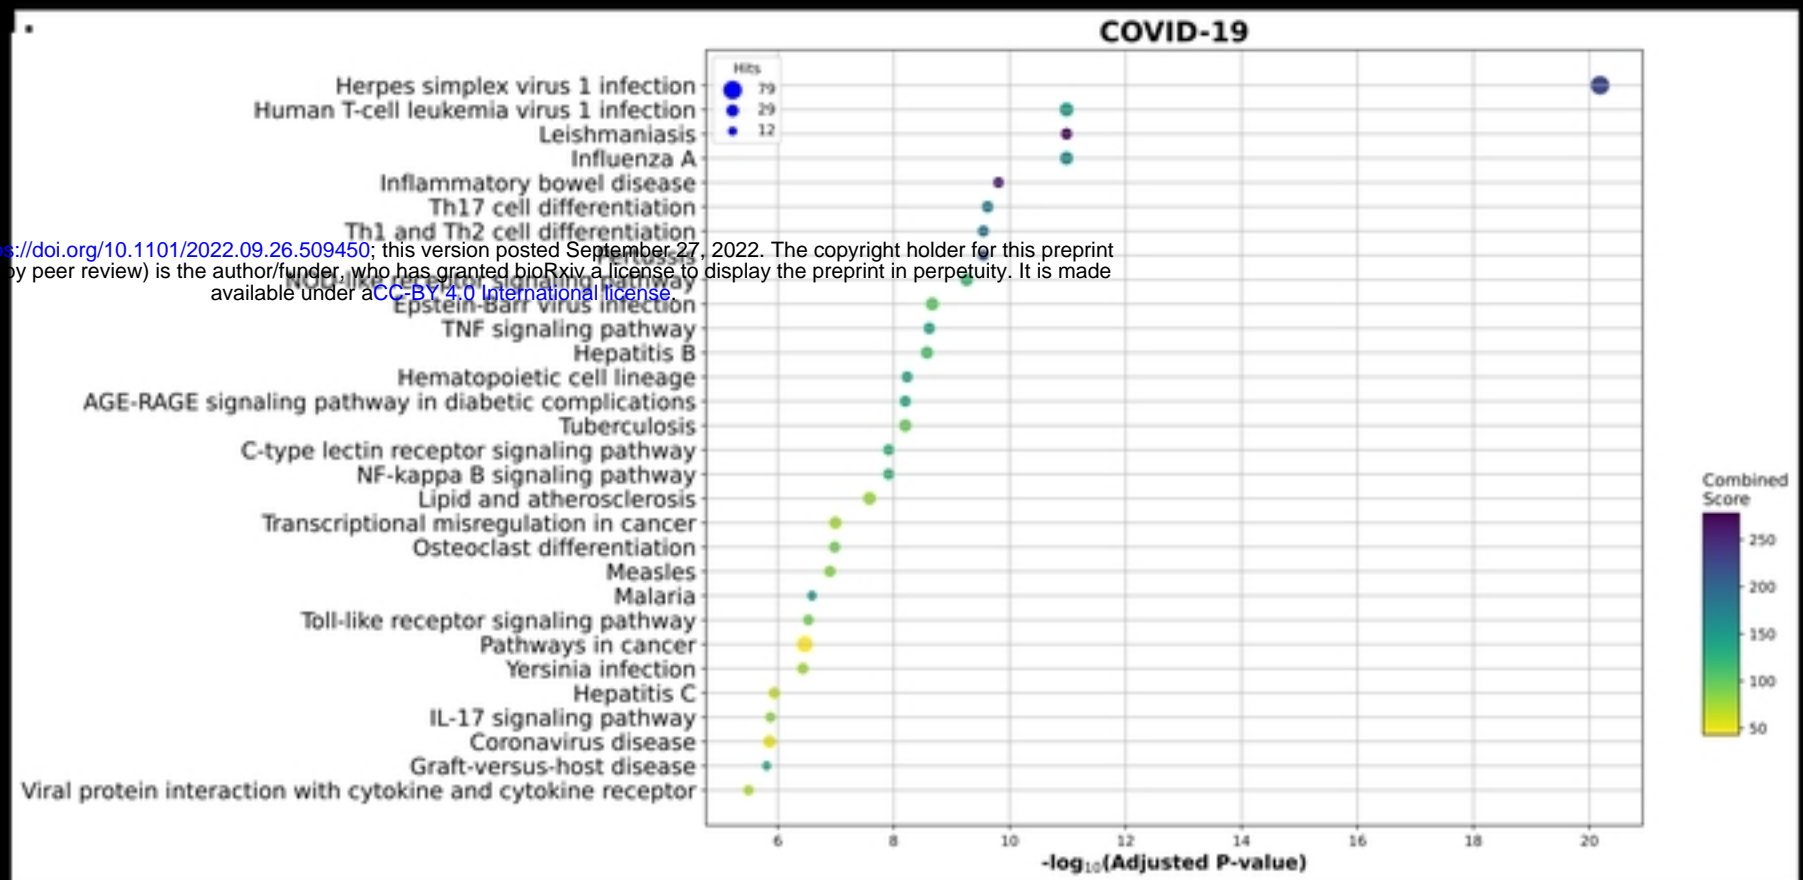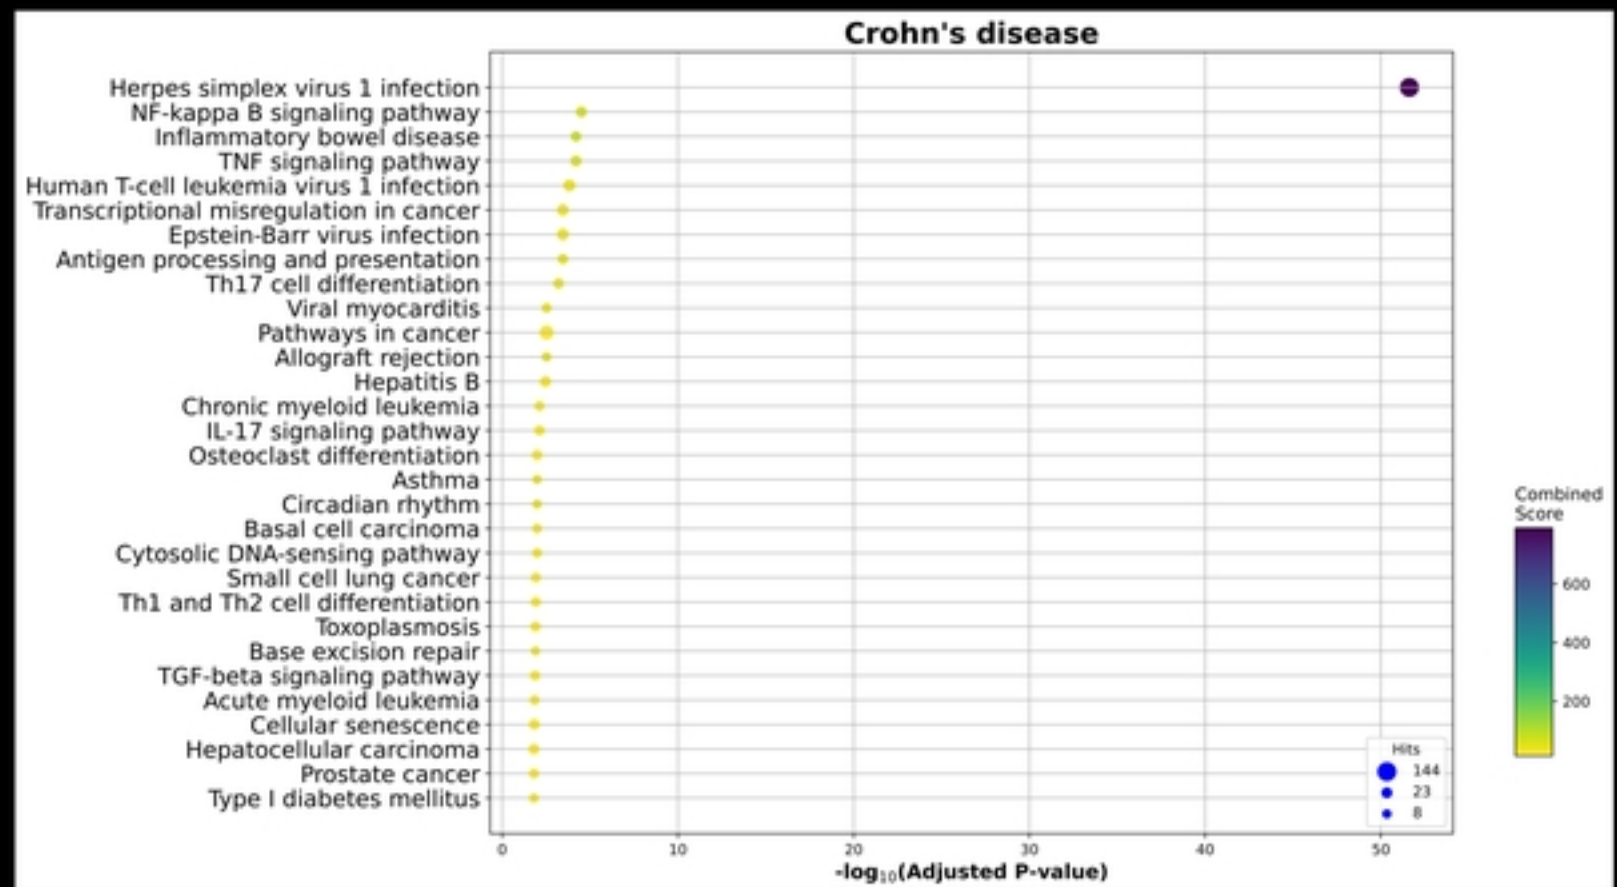

Figure3





→ Stronger in disease  
→ Stronger in control

bioRxiv preprint doi: <https://doi.org/10.1101/2022.09.26.509450>; this version posted September 27, 2022. The copyright holder for this preprint (which was not certified by peer review) is the author/funder, who has granted bioRxiv a license to display the preprint in perpetuity. It is made available under aCC-BY 4.0 International license.

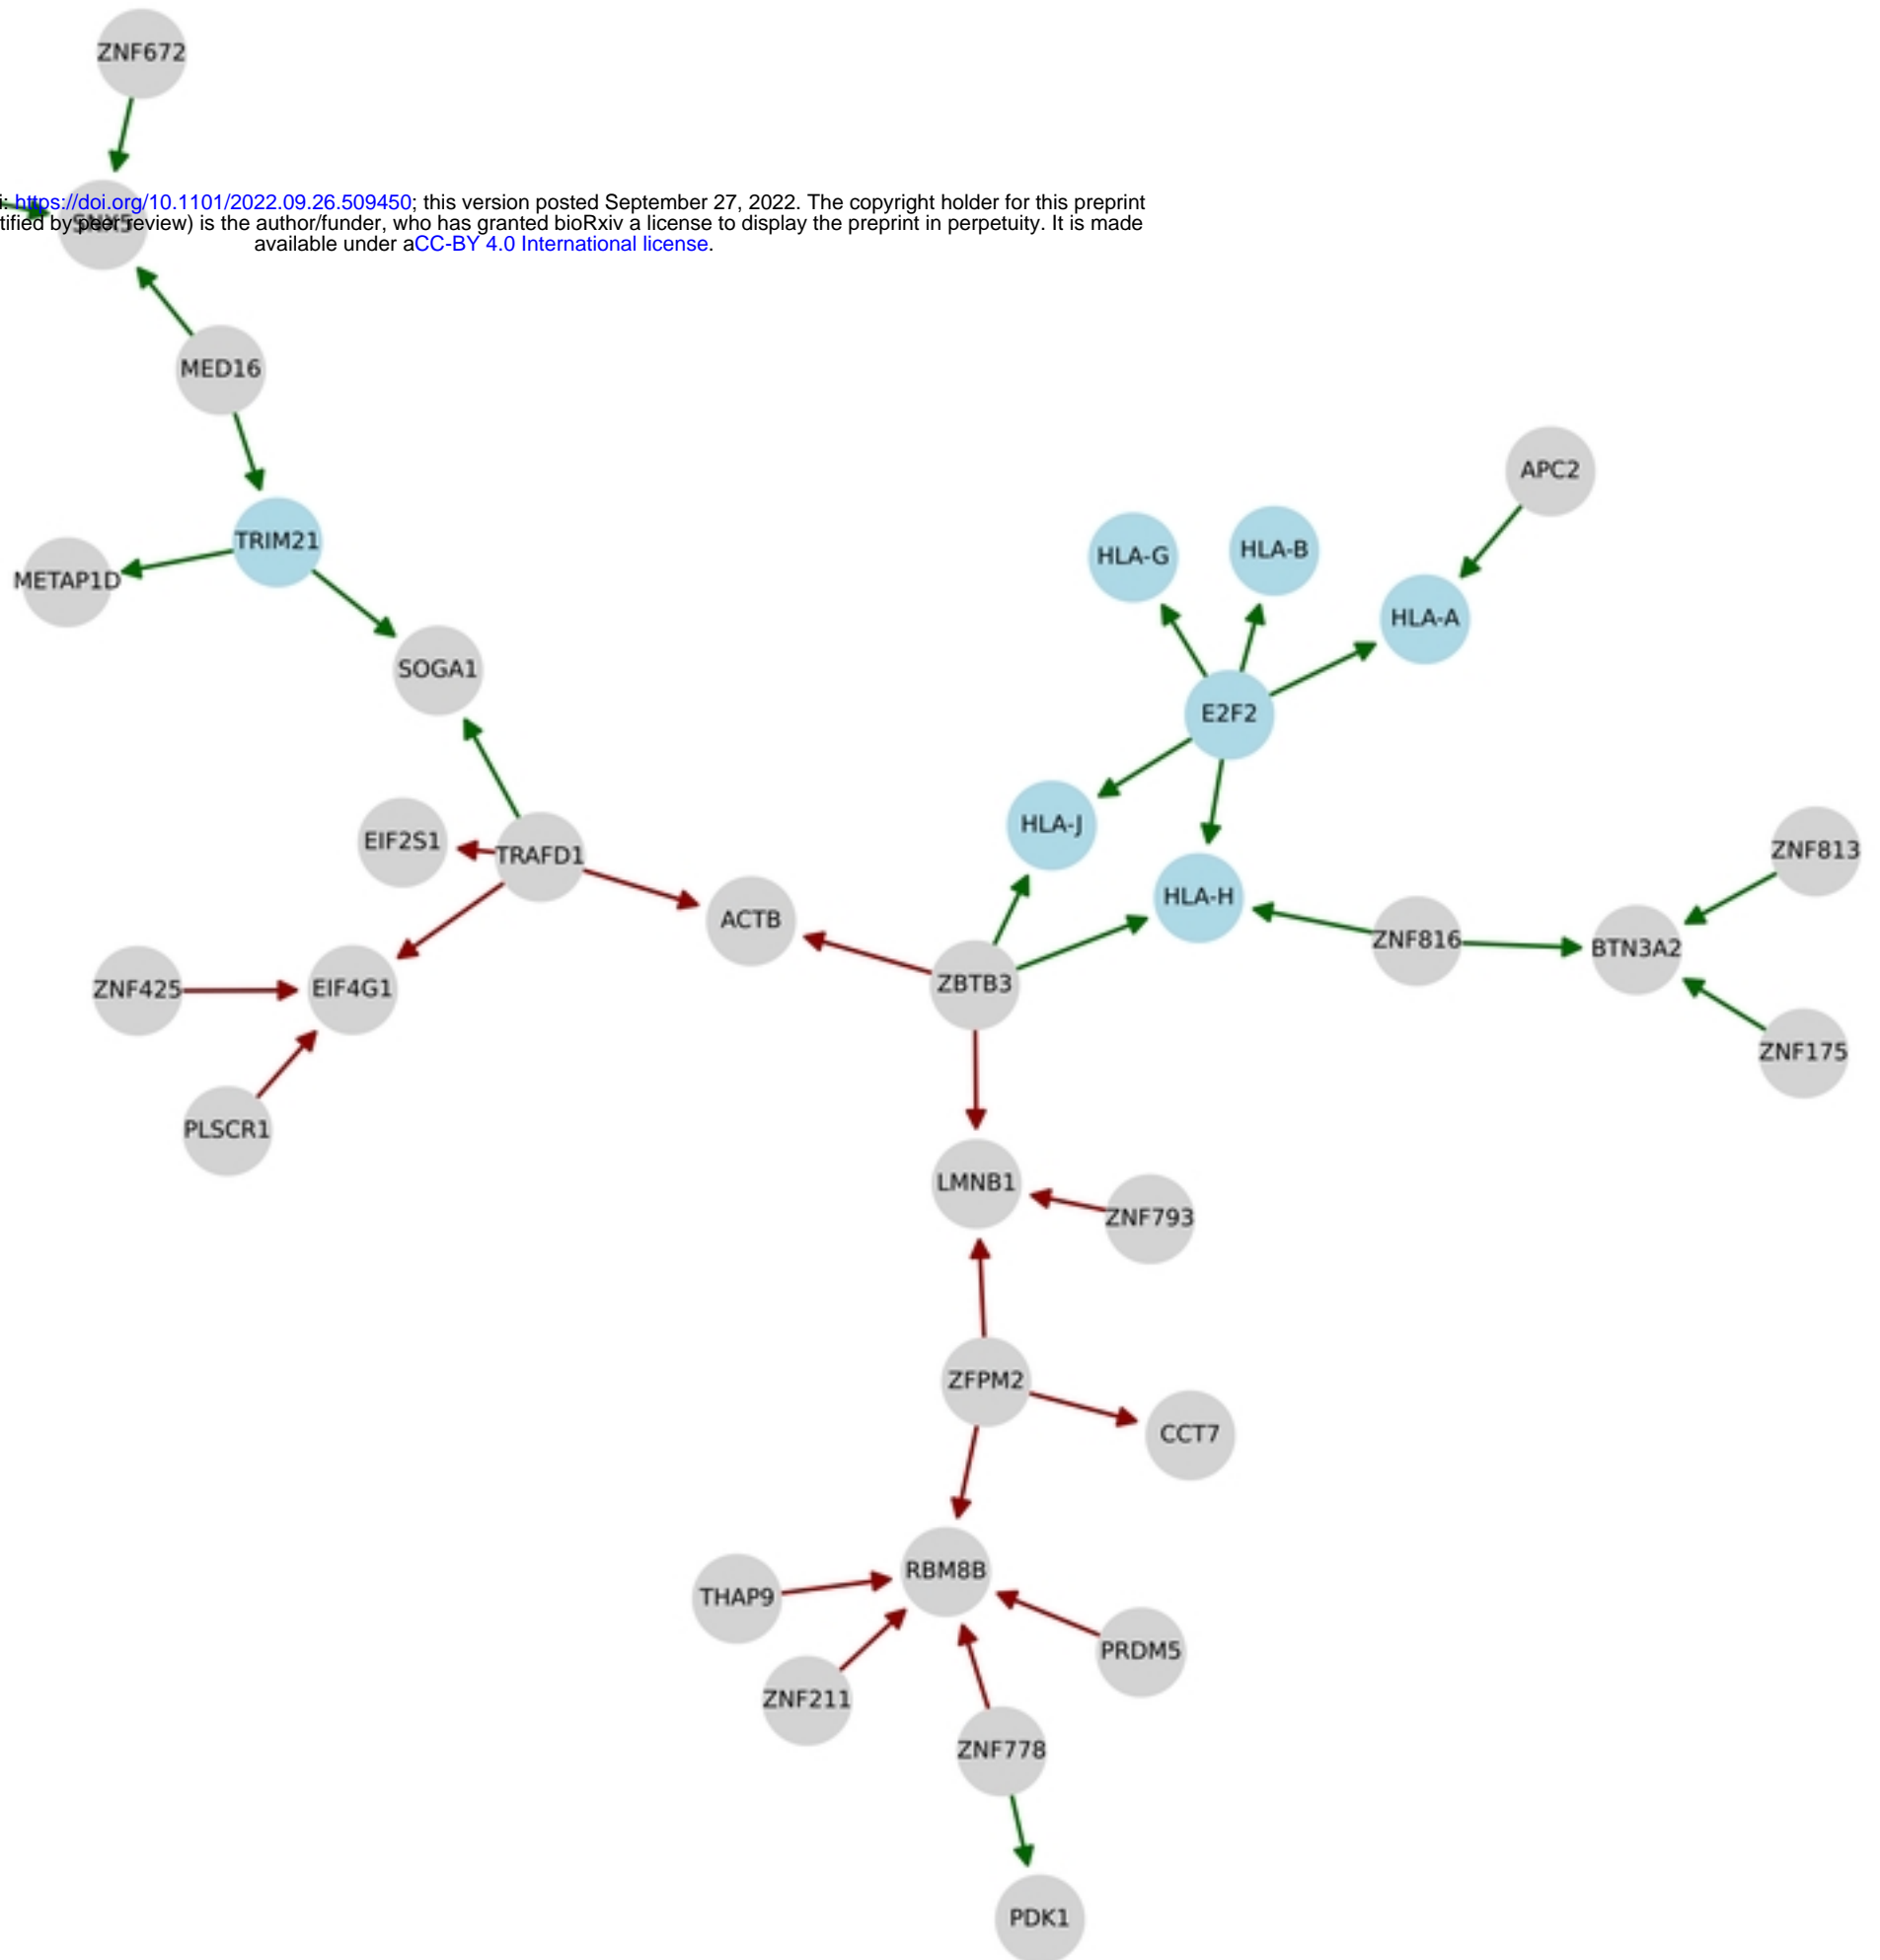

Figure5

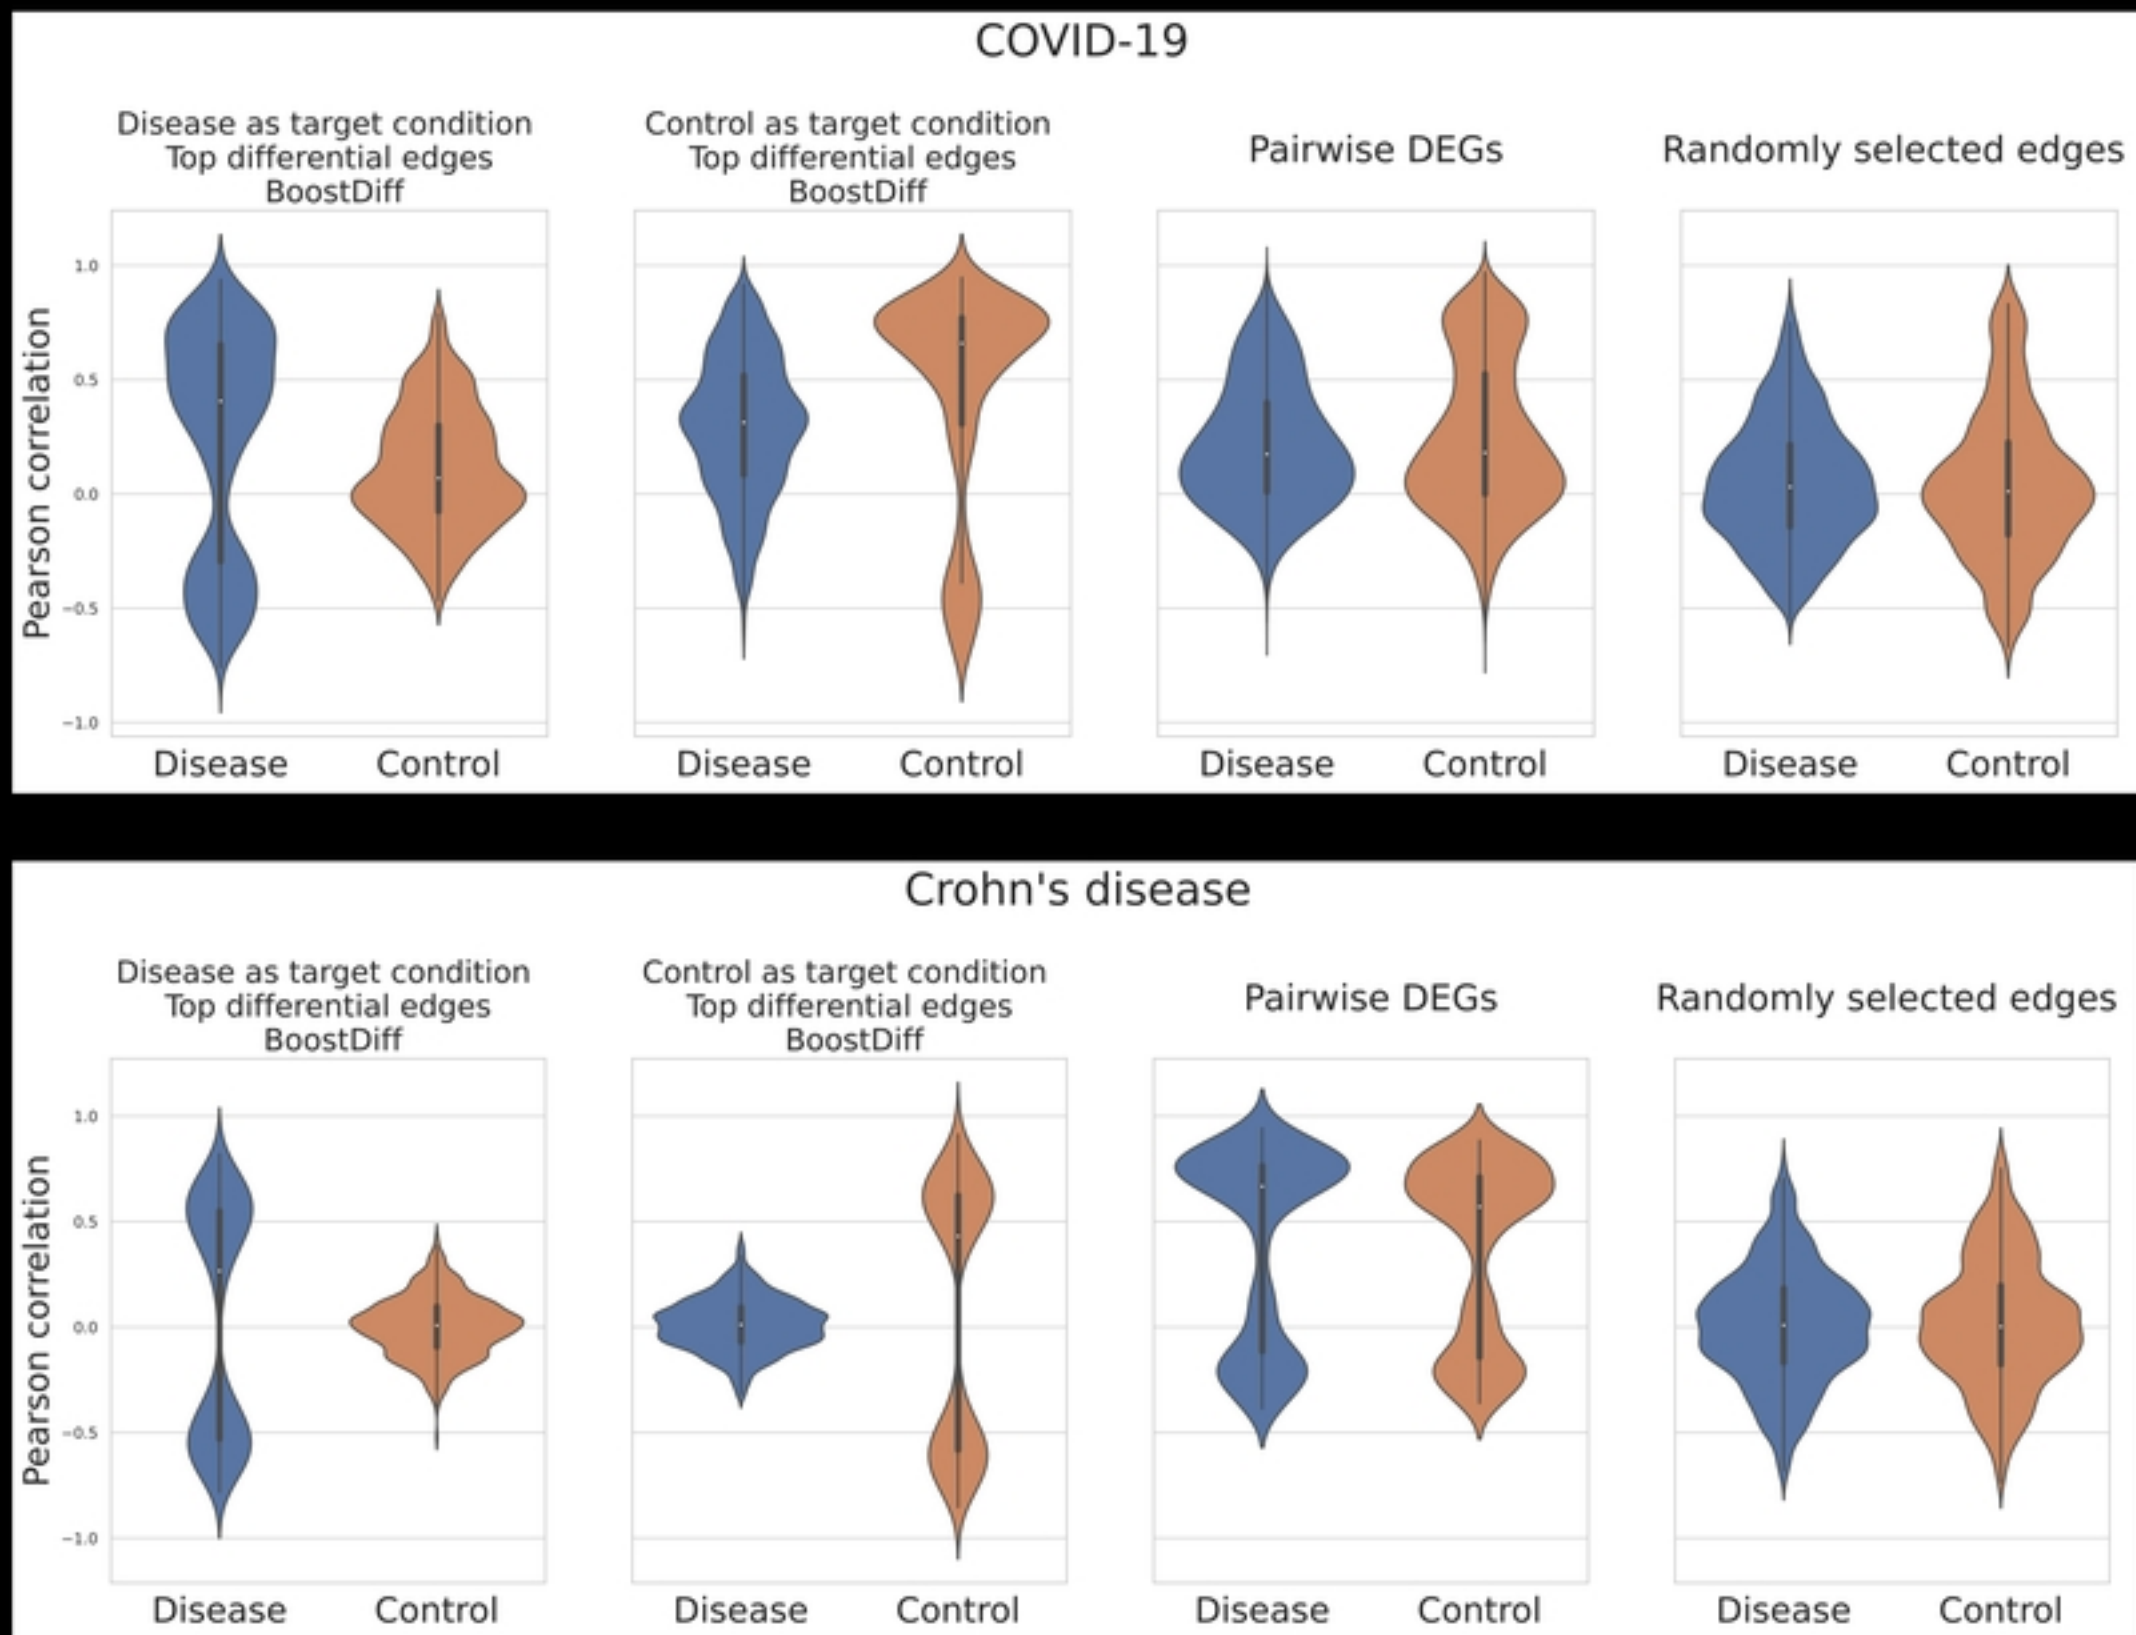

Figure6
